**1. Manuscript title:** Sparse interaction between oligodendrocyte precursor cells (NG2<sup>+</sup> cells) and nodes of Ranvier in the central nervous system

**2. Abbreviated title:** Glia and nodes of Ranvier

**3. Authors:** Lindsay M. De Biase<sup>1,a,\*</sup>, Michele L. Pucak<sup>1,\*</sup>, Shin H. Kang<sup>1,b</sup>, Stephanie N. Rodriguez<sup>1,c</sup>, Dwight E. Bergles<sup>1</sup>

1. The Solomon H. Snyder Department of Neuroscience, The Johns Hopkins University School of Medicine, Baltimore, MD, USA.
  - a) Current affiliation: Cellular Neurobiology, National Institute on Drug Abuse, Baltimore, MD, USA.
  - b) Current affiliation: Shriners Hospitals Pediatric Research Center, Temple University School of Medicine, Philadelphia, PA, USA.
  - c) Current affiliation: Department of Pathology and Immunology, Washington University School of Medicine, St. Louis, MO, USA.

\* Equal contribution

**4. Author contributions:** LMD, MLP, and DEB designed research, LMD, MLP, and SNR performed research, SHK contributed reagents/ analytic tools, LMD, MLP, and SNR analyzed data, LMD, MLP, and DEB wrote the paper.

**5. Correspondence:**

Dr. Dwight Bergles  
The Johns Hopkins University School of Medicine  
The Solomon H. Snyder Department of Neuroscience  
1001 Wood Basic Science Building  
725 N. Wolfe St.  
Baltimore, MD 21205

[dbergles@jhmi.edu](mailto:dbergles@jhmi.edu)  
410-955-6939

|                                        |            |                                                       |             |
|----------------------------------------|------------|-------------------------------------------------------|-------------|
| <b>6. Number of Figures</b>            | <b>10</b>  | <b>10. Number of words for Significance Statement</b> | <b>75</b>   |
| <b>7. Number of Tables</b>             | <b>1</b>   | <b>11. Number of words for Introduction</b>           | <b>484</b>  |
| <b>8. Number of Multimedia</b>         | <b>0</b>   | <b>12. Number of words for Discussion</b>             | <b>1706</b> |
| <b>9. Number of words for Abstract</b> | <b>242</b> |                                                       |             |

**13. Conflicts of Interest:** The authors report no conflict of interest.

**14. Acknowledgements:** The authors would like to thank: Dr. Jennifer Ziskin, Grace Kim, and Nadia Fakhari for help with pilot experiments and early development of experimental and analysis strategy; Dr. Martin Paukert for assistance with modifying MatLab code within Imaris MatLab XTensions; Dr. Richard Haganir (Johns Hopkins), Dr. Masahiro Fukaya (Hokkaido University), and Dr. Manzoor Bhat (UNC) for generously providing antibodies; The Multiphoton Imaging/Electrophysiology Core in the Department of Neuroscience at Johns Hopkins School of Medicine

**15. Sources of funding:** NS092009, NS080153, NS050274, and a Collaborative Research Center Grant from National Multiple Sclerosis Society

# 1 Sparse interaction between oligodendrocyte precursor cells (NG2<sup>+</sup> 2 cells) and nodes of Ranvier in the central nervous system

## 3 4 5 **ABSTRACT**

6 Regeneration of propagating action potentials at nodes of Ranvier allows nerve impulses to be  
7 conducted over long distances. Proper nodal function is believed to rely on intimate associations  
8 among axons, myelinating oligodendrocytes, and perinodal astrocytes. Studies in the optic nerve,  
9 corpus callosum, and spinal cord suggest that NG2<sup>+</sup> cells are also key constituents of CNS nodes  
10 and that these glia may influence conduction efficacy and formation of axon collaterals.  
11 However, the prevalence of NG2<sup>+</sup> cell processes at CNS nodes of Ranvier has not been  
12 rigorously quantified. Here we used a transgenic mouse expressing membrane-targeted EGFP to  
13 visualize the fine processes of NG2<sup>+</sup> cells and to quantify the spatial relationship between NG2<sup>+</sup>  
14 cells and nodes of Ranvier in four distinct CNS white matter tracts. NG2<sup>+</sup> cell processes came  
15 within close spatial proximity to a small percentage of nodes of Ranvier and approximately half  
16 of these spatial interactions were estimated to occur by chance. The majority of NG2<sup>+</sup> cell  
17 process tips were not found in close proximity to nodes and gray matter NG2<sup>+</sup> cells in regions of  
18 low nodal density were as morphologically complex as their white matter counterparts,  
19 indicating that attraction to nodes does not critically influence the elaboration of NG2<sup>+</sup> cell  
20 processes. Finally, there was no difference in nodal density between small regions devoid of  
21 NG2<sup>+</sup> cell processes and those containing numerous NG2<sup>+</sup> cells processes, demonstrating that the  
22 function of CNS nodes of Ranvier does not require ongoing interaction with NG2<sup>+</sup> cells.

23  
24 **Significance Statement:** Effective propagation of action potentials along neuronal axons is  
25 dependent upon periodic regeneration of depolarization at nodes of Ranvier. The position,  
26 structural integrity, and function of nodes of Ranvier is believed to be regulated, in part, by  
27 intimate physical interactions between nearby glial cells and nodes. Clarifying whether  
28 oligodendrocyte precursor cells are obligate members of this nodal support system is critical for  
29 defining whether these cells contribute to pathologies in which nodal structure is compromised.

## 30 31 **INTRODUCTION**

1 Conduction velocity in central axons is exquisitely regulated by axon diameter, nodal size, nodal  
2 ion channel composition, and the length of internodes, or the region of compact myelin between  
3 nodes of Ranvier (NOR). Indeed, these parameters can be varied such that impulses in axons of  
4 different length arrive at their targets synchronously (Stanford, 1987; Sugihara et al., 1993),  
5 suggesting that NOR structure and placement can influence circuit function. Interactions between  
6 schwann cell microvilli and the nodal axolemma has been shown to play a critical role in NOR  
7 formation and maintenance in the PNS (Eshed et al., 2005). Such microvilli are absent from CNS  
8 NOR and it is unclear what nodal component carries out analogous functions in the CNS.  
9 Mutations that disrupt nodal structure while preserving myelination lead to decreases in  
10 conduction velocity and severe functional deficits (Dupree et al., 1998; Honke et al., 2002;  
11 Ishibashi et al., 2002), indicating the importance of defining the exact structural and functional  
12 composition of central nodes.

13  
14 NG2<sup>+</sup> cells (also termed OPCs or polydendrocytes) are ubiquitous glial progenitors that give rise  
15 to oligodendrocytes during development and potentially throughout life (Rivers et al., 2008; Zhu  
16 et al., 2008; Kang et al., 2010). NG2<sup>+</sup> cells form synapses with unmyelinated axons in white  
17 matter (Kukley et al., 2007; Ziskin et al., 2007) and have also been shown in electron  
18 micrographs to contact NOR in the optic nerve and corpus callosum (Butt et al., 1999; Serwanski  
19 et al., 2017), raising the possibility that interaction with axons is a major function of these cells.  
20 Immunohistochemical studies have estimated that NG2<sup>+</sup> cells contact up to 71% of NOR in  
21 white matter tracts (Hamilton et al., 2010; Serwanski et al., 2017) and that glycoproteins  
22 expressed by spinal cord NG2<sup>+</sup> cells play a role in limiting neurite outgrowth at NOR (Huang et  
23 al., 2005) and can influence conduction of nerve impulses (Hunanyan et al., 2010). If NG2<sup>+</sup> cells  
24 perform critical roles in regulating NOR structure or function, the processes of these glial cells  
25 would be expected to constitute a key component of nodal structure. However, detailed  
26 quantification of the prevalence of NG2<sup>+</sup> cell interactions with NOR has not been carried out.

27  
28 We used transgenic mice in which NG2<sup>+</sup> cells express membrane-anchored EGFP to examine the  
29 spatial relationship between these cells and surrounding axons in 4 CNS white matter tracts. This  
30 analysis revealed that the fine processes of these glia are not obligate components of nodal  
31 structure. NG2<sup>+</sup> cells displayed only sparse interaction with surrounding NOR and this

1 interaction was not a key factor guiding NG2<sup>+</sup> cell process elaboration. In addition, NOR density  
2 did not differ between regions with abundant NG2<sup>+</sup> cells processes and regions devoid of NG2<sup>+</sup>  
3 cell processes. Together, these data suggest that CNS nodes do not require ongoing interaction  
4 with NG2<sup>+</sup> cells and that regulation of nodal structure or function is unlikely to be a dominant  
5 functional role of NG2<sup>+</sup> cells in the adult CNS.

6

## 7 **MATERIALS AND METHODS**

8

### 9 **Transgenic mice.**

10 *NG2-mEGFP* BAC transgenic mice express membrane-targeted EGFP under control of the NG2  
11 (*Cspg4*) gene promoter. To target EGFP to the plasma membrane, the first 26 amino acids of  
12 Lck, a Src family tyrosine kinase which contains two palmitoylation domains and a  
13 myristoylation domain, was fused to the N-terminus of EGFP. Both a low *NG2-mEGFP-L* and  
14 high *NG2-mEGFP-H* expression line were maintained and used for experiments. Male and  
15 female mice were used and all experiments were carried out in strict accordance with protocols  
16 approved by the Author's University.

17

### 18 **Histology.**

19 *NG2-mEGFP* mice age P25-P85 were deeply anesthetized with pentobarbital (100 mg/kg) and  
20 subjected to cardiac perfusion with 4% paraformaldehyde (PFA) in 0.1 M sodium phosphate  
21 buffer in accordance with a protocol approved by the Animal Care and Use Committee at the  
22 Author's Institute. Forebrain (FB), cerebellum (CB), optic nerves (ON), and spinal cord (SC)  
23 were gently dissected free and post fixed in 4% PFA at 4°C for 2 hrs. Tissue was cryoprotected  
24 in 30% sucrose for 2hrs (ON), 4hrs (SC), or overnight (CB, FB) and then embedded in OTC and  
25 sectioned at 50 or 60µm with a cryostat. FB, CB, and SC tissue sections were pre-treated with  
26 2N HCl for 30min at 37°C, followed by 0.1 M sodium borate at room temperature (RT) for  
27 15min. Free-floating sections were then permeabilized/blocked with 0.3% Triton X-100 and 5%  
28 normal donkey serum in 0.1 M sodium phosphate buffer for 2 hrs at room temperature. Sections  
29 were then incubated with primary antibodies prepared in permeabilizing/blocking solution for 5  
30 hrs at room temperature before being fixed a second time with 4% PFA for 2 hrs at 4°C. Sections  
31 were then incubated with secondary antibodies in 5% normal donkey serum in 0.1 M sodium



1 phosphate buffer for 2 hrs at room temperature before mounting on slides. Primary antibodies  
2 used: rabbit anti-GFP (1:500, gift from Dr. Haganir, Johns Hopkins), mouse anti-GFP (1:1000,  
3 Neuromab), guinea-pig and goat anti-GFP (1:500, gift from Dr. Fukaya, Hokkaido University),  
4 mouse pan-sodium channel antibody (1:1000, Sigma), guinea pig anti-Caspr (1:1500, gift from  
5 Dr. Bhat, UNC), rabbit and guinea pig anti-NG2 (1:500, gift from Dr. Stallcup, Burnham  
6 Institute). Secondary antibodies (raised in donkey): Alexa 488- (Molecular Probes), Cy2-, Cy3-  
7 or Cy5-conjugated secondary antibodies to rabbit, mouse, goat or guinea pig (1:500; Jackson  
8 ImmunoResearch). Control sections incubated with secondary antibody alone did not result in  
9 labeling of cells.

10

### 11 **Image Acquisition and Analysis.**

12 Fluorescence images were collected with a LSM 510 Meta confocal microscope (Zeiss). For 3  
13 dimensional reconstruction of NG2<sup>+</sup> cells and NOR, stacks of confocal images (0.3  $\mu$ m z-  
14 interval) were de-convolved using Autoquant software with a blind deconvolution algorithm.  
15 Images were then imported into Imaris image analysis software (Bitplane, RRID:SCR\_007370  
16 and SCR\_007366 and for reconstruction and quantification. For analysis of individual cells, the  
17 filament tracing module was used to reconstruct cell morphology in 3 dimensions and the spots  
18 module was used to tag the 3D location of all NOR within the field of view. MatLab XTensions  
19 were then used to identify spots (NOR) that fall within different distances of the filament (cell  
20 surface). To estimate spatial interactions that occur by chance, the NOR image was flipped about  
21 the Y- or Z- axis, or was shifted laterally by 5  $\mu$ m and analysis was repeated. For analysis of  
22 volumes of tissue without focus on individual cells, the surfaces module was used to reconstruct  
23 all NG2<sup>+</sup> surfaces within the field of view. The 3D location of NOR was tagged with the spots  
24 module as before and MatLab XTensions were again used to identify NOR within different  
25 distances of the reconstructed surface.

26

### 27 **Statistics.**

28 Data are expressed as mean  $\pm$  SEM throughout. Statistical significance when comparing across  
29 groups was determined using ANOVA followed by student's T-test with sequential Bonferroni's  
30 correction for multiple comparisons. A paired t-test was used to determine statistical significance

- 1 when comparing observed vs. random spatial interactions between NG2<sup>+</sup> cells and NOR. Details
- 2 for all statistical tests are listed below.
- 3

|                                                                                                                                                                                                                                                                      | Data structure | Type of test      | Statistics                                                                                                                | p-value                                                                          | N                                                                                                           |
|----------------------------------------------------------------------------------------------------------------------------------------------------------------------------------------------------------------------------------------------------------------------|----------------|-------------------|---------------------------------------------------------------------------------------------------------------------------|----------------------------------------------------------------------------------|-------------------------------------------------------------------------------------------------------------|
| Putative contacts between individual NG2 <sup>+</sup> cells and NOR in ON in actual vs. rotated NOR distributions<br><b>(Results; Optic nerve NG2<sup>+</sup> cells rarely contact nodes of Ranvier; paragraph 4)</b>                                                | Normal         | Paired t-test     | $t_{(9)} = 5.6$                                                                                                           | $P = 0.0003$                                                                     | ON $N = 10$ cells                                                                                           |
| Number of NOR found within 5 $\mu\text{m}$ of reconstructed NG2 <sup>+</sup> cells in ON, SC wm, CB wm, CC <b>(Results; NG2<sup>+</sup> cells in diverse white matter tracts rarely associate with NOR; paragraph 1)</b>                                             | Normal         | One way ANOVA     | $F_{(3,25)} = 2.1$                                                                                                        | $P = 0.12$                                                                       | ON $N = 10$ , SC wm $N = 7$ , CB wm $N = 7$ , CC $N = 5$ cells                                              |
| Putative contacts between individual NG2 <sup>+</sup> cells and NOR in SC wm, CB wm, and CC in actual vs. rotated NOR distributions <b>(Results; NG2<sup>+</sup> cells in diverse white matter tracts rarely associate with NOR; paragraph 1)</b>                    | Normal         | Paired t-test     | SC wm $t_{(6)} = 12.5$ , CB wm $t_{(6)} = 11.7$ , CC $t_{(4)} = 5.6$                                                      | SC wm $P < 0.0001$ , CB wm $P < 0.0001$ , CC $P = 0.09$                          | SC wm $N = 7$ , CB wm $N = 7$ , CC $N = 5$ cells                                                            |
| Putative contacts between all NG2 <sup>+</sup> cells and NOR in a given field of view in ON, SC wm, and CB wm in actual vs. rotated NOR distributions<br><b>(Results; Region based analysis confirms sparse NG2<sup>+</sup> cell - NOR association; paragraph 2)</b> | Normal         | Paired t-test     | ON $t_{(6)} = 10.1$ , SC wm $t_{(6)} = 5.3$ , CB wm $t_{(7)} = 6.2$                                                       | ON $P = 0.02$ , SC wm $P = 0.002$ , CB wm $P = 0.0004$                           | ON $N = 7$ , SC wm $N = 7$ , CB wm $N = 8$ FOV                                                              |
| Number of putative NG2 <sup>+</sup> cells-NOR contacts is lower using a region-based as opposed to cell-based analysis<br><b>(Results; Region based analysis confirms sparse NG2<sup>+</sup> cell - NOR association; paragraph 3)</b>                                | Normal         | Two way ANOVA     | Effect of brain region $F_{(2,42)} = 0.7$ ; Effect of analysis type $F_{(1,42)} = 30.2$ ; Interaction $F_{(3,42)} = 11.0$ | Brain region $P = 0.49$ , Analysis type: $P < 0.0001$ , Interaction $P < 0.0001$ | ON $N = 10$ cells and $N = 7$ FOV, SC wm $N = 7$ cells and $N = 7$ FOV, CB wm $N = 7$ cells and $N = 8$ FOV |
| <b>Figure 7B</b>                                                                                                                                                                                                                                                     | Normal         | Linear regression | $R^2 = -0.1$                                                                                                              | $P = 0.78$                                                                       | ON $N = 4$ FOV, SC wm $N = 4$ FOV, CB wm $N = 4$ FOV                                                        |

|                                                                                                                                                                                                |        |                                                 |                                                                                                                                                                                                                                                                                |                                                                                                                                                                                                                                            |                                                                                             |
|------------------------------------------------------------------------------------------------------------------------------------------------------------------------------------------------|--------|-------------------------------------------------|--------------------------------------------------------------------------------------------------------------------------------------------------------------------------------------------------------------------------------------------------------------------------------|--------------------------------------------------------------------------------------------------------------------------------------------------------------------------------------------------------------------------------------------|---------------------------------------------------------------------------------------------|
| Differences in NOR density across white matter brain regions ( <b>Results; Association with NOR does not play a crucial role in shapting morphology of NG2<sup>+</sup> cells;</b> paragraph 1) | Normal | One way ANOVA                                   | $F_{(3,47)} = 43.0$                                                                                                                                                                                                                                                            | $P < 0.0001$                                                                                                                                                                                                                               | ON $N = 17$ , SC wm $N = 14$ , CB wm $N = 15$ , CC $N = 5$ FOV                              |
| <b>Figure 9C</b> NOR density in gray matter is less than white matter                                                                                                                          | Normal | One way ANOVA, sequential Bonferroni correction | $F_{(5,58)} = 66.5$ ; ON vs HC $t_{(23)} = 12.1$ ; SC wm vs HC $t_{(20)} = 12.3$ ; CB wm vs HC $t_{(21)} = 10.2$ ; ON vs CB gm $t_{(20)} = 9.7$ ; CB wm vs CB gm $t_{(18)} = 8.4$ ; CC vs HC $t_{(11)} = 7.6$ ; CC vs CB gm $t_{(8)} = 6.0$ ; SC wm vs CB gm $t_{(17)} = 10.0$ | ANOVA $P < 0.0001$ , ON vs HC $P < 0.0001$ ; SC wm vs HC $P < 0.0001$ ; CB wm vs HC $P < 0.0001$ ; ON vs CB gm $P < 0.0001$ ; CB wm vs CB gm $P < 0.0001$ ; CC vs HC $P < 0.0001$ ; CC vs CB gm $P = 0.0003$ ; SC wm vs CB gm $P < 0.0001$ | ON $N = 17$ , SC wm $N = 14$ , CB wm $N = 15$ , CC $N = 5$ , HC $N = 8$ , CB gm $N = 5$ FOV |
| <b>Figure 9D</b> NG2 <sup>+</sup> cells in white matter are not more complex than NG2 <sup>+</sup> cells in gray matter (total process length)                                                 | Normal | One way ANOVA, sequential Bonferroni correction | $F_{(5,35)} = 3.7$ ; ON vs HC $t_{(12)} = -4.0$ ; SC wm vs HC $t_{(9)} = -1.9$ ; CB wm vs HC $t_{(9)} = -3.7$ ; ON vs CB gm $t_{(12)} = -2.7$ ; CB wm vs CB gm $t_{(9)} = -2.6$ ; CC vs HC $t_{(11)} = -2.4$ ; CC vs CB gm $t_{(11)} = -1.4$ ; SC wm vs CB gm $t_{(9)} = -0.4$ | ANOVA $P = 0.008$ ; ON vs HC $P = 0.002$ ; SC wm vs HC $P = 0.1$ ; CB wm vs HC $P = 0.005$ ; ON vs CB gm $P = 0.02$ n.s.; CB wm vs CB gm $P = 0.03$ n.s.; CC vs HC $P = 0.04$ n.s.; CC vs CB gm $P = 0.19$ ; SC wm vs CB gm $P = 0.71$     | ON $N = 10$ , SC wm $N = 7$ , CB wm $N = 7$ , CC $N = 9$ , HC $N = 4$ , CB gm $N = 4$ cells |
| <b>Figure 9E</b> NG2 <sup>+</sup> cells in white matter are not more complex than NG2 <sup>+</sup> cells                                                                                       | Normal | One way ANOVA,                                  | $F_{(5,35)} = 9.1$ ; ON vs                                                                                                                                                                                                                                                     | ANOVA $P < 0.0001$ ;                                                                                                                                                                                                                       | ON $N = 10$ , SC wm $N =$                                                                   |

|                                                                                                                                  |        |                                  |                                                                                                                                                                                                                                                     |                                                                                                                                                                                            |                                                                  |
|----------------------------------------------------------------------------------------------------------------------------------|--------|----------------------------------|-----------------------------------------------------------------------------------------------------------------------------------------------------------------------------------------------------------------------------------------------------|--------------------------------------------------------------------------------------------------------------------------------------------------------------------------------------------|------------------------------------------------------------------|
| in gray matter (# of branch points)                                                                                              |        | sequential Bonferroni correction | HC $t_{(12)} = -5.1$ ; SC wm vs HC $t_{(9)} = -3.9$ ; CB wm vs HC $t_{(9)} = -6.1$ ; ON vs CB gm $t_{(12)} = -2.8$ ; CB wm vs CB gm $t_{(9)} = -4.3$ ; CC vs HC $t_{(11)} = -3.8$ ; CC vs CB gm $t_{(11)} = -2.1$ ; SC wm vs CB gm $t_{(9)} = -2.1$ | ON vs HC P = 0.0003; SC wm vs HC P = 0.003; CB wm vs HC P = 0.0002; ON vs CB gm P = 0.02 n.s.; CB wm vs CB gm P = 0.002; CC vs HC P = 0.003; CC vs CB gm P = 0.06; SC wm vs CB gm P = 0.06 | 7, CB wm $N = 7$ , CC $N = 9$ , HC $N = 4$ , CB gm $N = 4$ cells |
| <b>Figure 10A</b> % of NOR within 0.5 $\mu\text{m}$ of NG2 <sup>+</sup> cells in adult ON and P25 ON (5 $\mu\text{m}$ territory) | Normal | t-test                           | Adult ON vs P25 ON $t_{(13)} = 1.4$                                                                                                                                                                                                                 | Adult ON vs P25 ON P = 0.17                                                                                                                                                                | Adult ON $N = 10$ , P25 ON $N = 5$ cells                         |
| <b>Figure 10B</b> % of NOR within 0.5 $\mu\text{m}$ of NG2 <sup>+</sup> cells in adult ON and P25 ON (1 $\mu\text{m}$ territory) | Normal | t-test                           | Adult ON vs P25 ON $t_{(13)} = 1.9$                                                                                                                                                                                                                 | Adult ON vs P25 ON P = 0.09                                                                                                                                                                | Adult ON $N = 10$ , P25 ON $N = 5$ cells                         |

1 ON = optic nerve  
 2 SC wm = spinal cord white matter  
 3 CB wm = cerebellar white matter  
 4 CC = corpus callosum  
 5  
 6  
 7  
 8  
 9  
 10  
 11  
 12  
 13  
 14  
 15  
 16

HC = hippocampus  
 CB gm = cerebellar gray matter  
 FOV = field of view  
 n.s. = not significant

## 7 RESULTS

### 9 *Optic nerve NG2<sup>+</sup> cells rarely contact nodes of Ranvier*

10 To visualize the fine processes of NG2<sup>+</sup> cells in the CNS, we used BAC transgenic mice that  
 11 express membrane-targeted EGFP under control of the NG2 promoter (*NG2-mEGFP*) (**Figure**  
 12 **1A**). In these mice, EGFP<sup>+</sup> cells are immunoreactive for NG2 (**Figure 1A**) and PDGF $\alpha$ R, but do  
 13 not express markers for astrocytes, microglia, or neurons (Hughes et al., 2013). EGFP expression  
 14 was observed in some pericytes (**Figure 1A,B**); these endothelial cells, which surround blood  
 15 vessels, could be unequivocally identified by their bipolar morphology and proximity to blood  
 16 vessels and were excluded from analysis. Within NG2<sup>+</sup> cells, EGFP-expression labeled the full

1 extent of distal cell processes and did not alter the number of distal process filopodia (Hughes et  
2 al., 2013). Two independent lines of *NG2-mEGFP* mice were maintained, one in which ~90% of  
3  $NG2^+$  cells express EGFP (high expression line; *NG2-mEGFP-H*) and one in which ~30% of  
4  $NG2^+$  cells express EGFP (low expression line; *NG2-mEGFP-L*) (**Figure 1B,C**) (Hughes et al.,  
5 2013). In both transgenic lines,  $EGFP^+ NG2^+$  cells were distributed evenly throughout gray and  
6 white matter regions, suggesting that transgene expression is not limited to a subset of  $NG2^+$   
7 cells.

8  
9 To determine whether individual  $NG2^+$  cells interact with NOR in their vicinity, we examined  
10  $EGFP^+ NG2^+$  cells in optic nerve (ON) from adult (P55-85) *NG2-mEGFP-L* mice. The optic  
11 nerve is a uniquely “pure” white matter tract in that it contains axons derived solely from retinal  
12 ganglion cells, and 100% of these axons are myelinated. As such, the ON provides an ideal  
13 setting for examining the relationship between myelinated axons and the glial cells that surround  
14 them. The sparse EGFP expression in *NG2-mEGFP-L* mice allowed unambiguous analysis of  
15 isolated  $EGFP^+ NG2^+$  cells (**Figure 2A**), which displayed thin, branched processes and a roughly  
16 bipolar shape oriented along the same axis as nerve fibers, as previously reported (Butt et al.,  
17 1999). Stacks of confocal images of individual  $EGFP^+ NG2^+$  cells were used to create a 3-  
18 dimensional reconstruction of cell morphology (**Figure 2A-D**). NOR in the surrounding tissue  
19 were visualized by immunostaining for voltage-gated sodium channels (NaV), which are  
20 clustered at mature nodes, and for Caspr, a cell adhesion protein abundant in paranodal regions  
21 flanking NOR (Poliak and Peles, 2003) (**Figure 2E,F**). NOR were also reconstructed and the 3-  
22 dimensional position of each NOR within a confocal image stack was tagged (**Figure 2G,H**).  
23 The accuracy of this positional tagging was confirmed by examining high magnification overlap  
24 with NaV and caspr immunostaining (**Figure 2I**).

25  
26 As highlighted both by immunostaining and 3D positional tagging, NOR are found at very high  
27 density within optic nerve tissue. To determine whether  $NG2^+$  cells interact with NOR in their  
28 vicinity, we first defined which NOR fall within the “territory” of an individual reconstructed  
29 cell.  $NG2^+$  cells exhibit a tiled distribution and are not normally observed to extend processes  
30 into regions occupied by neighboring  $NG2^+$  cells (Dawson et al., 2003; Wigley and Butt, 2009).  
31 For this reason, NOR within 5  $\mu\text{m}$  of the reconstructed cell were taken as a reasonable estimation

1 of the territory of that cell (**Figure 3A**). For 10 reconstructed optic nerve NG2<sup>+</sup> cells, there were  
2 619 ± 45 NOR within 5 µm of NG2<sup>+</sup> cell processes, consistent with the high density of NOR in  
3 this white matter tract. However, only a small percentage of these NOR (14 ± 2 %, *N* = 10) were  
4 found within 0.5 µm of any portion of the NG2<sup>+</sup> cell membrane (**Figure 3A-C**). This percentage  
5 is likely an overestimation of the instances of actual contact between NG2<sup>+</sup> cells and NOR, as  
6 electron microscopic analysis indicates that NG2<sup>+</sup> cell processes interacting with NOR come  
7 within nanometers of the exposed nodal axolemma (Butt et al., 1999).

8  
9 Because the density of axons is high within optic nerve, many NOR are likely to be in close  
10 proximity to the highly ramified processes of NG2<sup>+</sup> cells simply by chance. To estimate the  
11 potential number of random spatial interactions, the NOR distribution for a given cell was  
12 rotated 180 degrees about the y- axis and quantification was repeated. With this approach 7 ± 1%  
13 of NOR within the territory of an NG2<sup>+</sup> cell came within 0.5 µm of the cell surface, indicating  
14 that approximately half of the observed associations can be explained by chance. Similar analysis  
15 was carried out by shifting NOR distributions laterally 5 µm or rotating NOR distributions about  
16 the Z-axis and comparable estimates of random associations were obtained (**Table 1**). This  
17 analysis indicates that > 90% of NOR within the territory of individual optic nerve NG2<sup>+</sup> cells  
18 are not associated with NG2<sup>+</sup> cell processes. However, the number of putative interactions  
19 observed with the actual NOR distribution was significantly greater than the number of  
20 associations expected by chance (*P* = 0.0003, paired t-test), suggesting that NG2<sup>+</sup> cells may form  
21 *bona fide* contacts with a small portion of NOR in their vicinity.

22

### 23 *NG2<sup>+</sup> cells in diverse white matter tracts rarely associate with NOR*

24 In spinal cord white matter, NG2<sup>+</sup> cells have been implicated in limiting neurite outgrowth at  
25 NOR either by direct contact with NOR or through deposition of Oligodendrocyte Myelin  
26 Glycoprotein (OMgp) (Huang et al., 2005). In addition, interaction of the NG2 proteoglycan  
27 with spinal cord NOR has been suggested to alter nerve impulse conduction (Hunanyan et al.,  
28 2010). Together, these findings suggest that NG2<sup>+</sup> cells may play a key role in regulating the  
29 function of spinal cord NOR, a conclusion that would seem at odds with the very sparse NG2<sup>+</sup>  
30 cell – NOR interaction observed in the ON. To determine whether the limited interaction  
31 between NG2<sup>+</sup> cells and NOR observed in ON is a consistent feature of CNS white matter tracts,

1 we performed similar analysis in spinal cord white matter (SC wm), cerebellar white matter (CB  
2 wm), and the corpus callosum (CC) (**Figure 4**). These white matter tracts are more  
3 heterogeneous than ON, containing both myelinated and unmyelinated axons that arise from  
4 diverse neuronal populations. However, nodal structure is relatively consistent across white  
5 matter regions and NG2<sup>+</sup> cells are ubiquitous throughout the CNS. Despite the increased  
6 heterogeneity of these white matter regions, the number of NOR found within 5 μm of  
7 reconstructed NG2<sup>+</sup> cells did not differ significantly from that observed in ON (ON 619 ± 45 *N* =  
8 10, SC wm 703 ± 54 *N* = 7, CB wm 537 ± 50 *N* = 7, CC 563 ± 32 *N* = 5; *P* = 0.12, ANOVA).  
9 Consistent with the analysis in ON, only a small percentage of NOR in the territory of NG2<sup>+</sup>  
10 cells in these additional white matter regions came within 0.5 μm of the cell surface (SC wm 14  
11 ± 1%, CB wm 11 ± 1%, CC 7 ± 2%) (**Figure 4B**). Random instances of close NG2<sup>+</sup> cell-NOR  
12 proximity were estimated as before (SC wm 5 ± 1%, CB wm 4 ± 0.3%, CC 4 ± 1%) and in all  
13 regions except CC, the number of NOR within 0.5 μm was significantly greater than what would  
14 be expected due to chance (SC wm *P* = 0.000001, CB wm *P* = 0.00002, CC *P* = 0.08; paired *t*-  
15 test). These values were then used to derive a “corrected” estimate of functionally relevant  
16 spatial interactions between NG2<sup>+</sup> cells and surrounding NOR (ON 7.0 ± 1%, SC wm 8.9 ±  
17 0.5%, CB wm 7.1 ± 1%, CC 3.0 ± 1%)(**Figure 4B**). Together, these data indicate that the spatial  
18 relationship of individual NG2<sup>+</sup> cells with NOR in the surrounding tissue is consistent across  
19 diverse CNS white matter tracts and that NG2<sup>+</sup> cells are in contact with only a small percentage  
20 of NOR.

21

#### 22 *Region based analysis confirms sparse NG2<sup>+</sup> cell - NOR association*

23 Morphological reconstruction of individual NG2<sup>+</sup> cells facilitates analysis of where along NG2<sup>+</sup>  
24 cell processes putative interactions occur and whether subsets of NG2<sup>+</sup> cells interact with NOR  
25 to differing degrees. However, this approach is limited by the necessity of defining the spatial  
26 territory of reconstructed cells. To determine whether the particular parameters of this analytical  
27 approach affect the detection of NG2<sup>+</sup> cell-NOR interactions, the definition of “proximity” was  
28 relaxed to 1 μm. As expected, in this analysis a higher percentage of NOR came within 1 μm of  
29 the cell surface (ON 25 ± 2% *N* = 10, SC wm 22 ± 1% *N* = 7, CB wm 20 ± 1% *N* = 7, CC 15 ±  
30 2% *N* = 5) (**Figure 4B**). However, the number of interactions estimated to occur by chance rose  
31 as well (ON 16 ± 1%, SC wm 11 ± 1%, CB wm 11 ± 1%, CC 10 ± 1%), leading to the same



1 conclusion that putative interactions occur between NG2<sup>+</sup> cells and a small percentage of NOR  
2 in their vicinity (ON 9 ± 2%, SC wm 11 ± 1%, CB wm 10 ± 1%, CC 5 ± 1%; observed%-  
3 random%). Similarly, when analysis was repeated using a cell “territory” of 10 μm or 2 μm,  
4 results did not differ significantly (**Figure 5A,B**).

5  
6 As a final confirmation that analysis of individual NG2<sup>+</sup> cells accurately reflects the relationship  
7 of these glia with surrounding NOR, we used the high expression *NG2-mEGFP-H* line of mice to  
8 quantify the proximity of NOR and NG2<sup>+</sup> cell processes in larger volumes of white matter  
9 without focusing on individual cells (**Figure 6**). In a given region of interest, all NG2<sup>+</sup> cell  
10 processes were reconstructed in 3 dimensions and the 3D position of NOR was tagged as before.  
11 Of all NOR present in the examined regions, only a small percentage came within 0.5 μm of an  
12 NG2<sup>+</sup> cell surface (ON 13 ± 3% *N* = 7, SC wm 4 ± 0.5% *N* = 7, CB wm 4 ± 0.2% *N* = 8) (**Figure**  
13 **6B**). Consistent with the analysis of individual NG2<sup>+</sup> cells, the observed number of associations  
14 was significantly greater than would be expected due to chance alone (ON *P* = 0.02, SC wm *P* =  
15 0.002, CB wm *P* = 0.0004, paired t-test; random associations ON 9 ± 2%, SC wm 2 ± 0.2%, CB  
16 wm 2 ± 0.3%, rotated NOR distribution). Corpus callosum was not included in this analysis  
17 because EGFP was not expressed by all callosal NG2<sup>+</sup> cells in this line of mice. When the  
18 definition of physical proximity was relaxed to 1 μm (**Figure 6C**), the number of NOR  
19 associated with NG2<sup>+</sup> cell processes increased, but so did the number of estimated random  
20 interactions, leading to a similar conclusion that only a small percentage of NOR within a given  
21 volume of tissue may possess *bona fide* associations with NG2<sup>+</sup> cell processes (ON 5 ± 2%, SC  
22 wm 2 ± 0.4%, CB wm 2 ± 0.3%; actual%-random%). Together these data indicate that analysis  
23 of individually reconstructed NG2<sup>+</sup> cells is a valid approach for probing their relationship with  
24 surrounding NOR.

25  
26 One key difference that emerged between region-based analyses and data from individually  
27 reconstructed NG2<sup>+</sup> cells, is that the number of observed putative interactions between NG2<sup>+</sup>  
28 cells and NOR was significantly lower using a region-based approach (*P* < 0.0001, Two-way  
29 ANOVA). Immunostaining for NG2 or examination of *NG2-mEGFP-H* mice reveals small zones  
30 within white matter that are devoid of NG2<sup>+</sup> cell processes (**Figure 6A and 7A**). These “voids”  
31 are not taken into consideration when quantifying only NOR that fall within the territory of an

1 individual cell; hence, this cell-based quantification approach could lead to an overestimation of  
2 the prevalence of NG2<sup>+</sup> cell-NOR associations. NOR density was comparable in regions with  
3 sparse or abundant NG2<sup>+</sup> cell processes, and no correlation was observed between the density of  
4 NOR and the degree of NG2<sup>+</sup> cell process coverage (**Figure 7B**), supporting the conclusion that  
5 NG2<sup>+</sup> cell processes are not requisite members of NOR whose continual presence is required for  
6 ongoing NOR function or maintenance in the adult CNS.

7

### 8 *NG2<sup>+</sup> cell processes rarely terminate at NOR*

9 Electron microscopic approaches indicate that NG2<sup>+</sup> cell processes which contact NOR appear to  
10 enwrap the exposed axolemma (Butt et al., 1999), suggesting that NG2<sup>+</sup> cells may extend  
11 specialized processes which terminate at NOR. Our data support the idea that NG2<sup>+</sup> cells interact  
12 with a small percentage of NOR in the surrounding neuropil. However, among the NOR that are  
13 within 0.5  $\mu\text{m}$  of NG2<sup>+</sup> cell surfaces, the majority were found along cell processes (*en passant*)  
14 (ON  $76 \pm 2\%$   $N = 10$ , SC wm  $74 \pm 2\%$   $N = 7$ , CB wm  $77 \pm 2\%$   $N = 7$ , CC  $88 \pm 2\%$   $N = 5$ ) rather  
15 than at the tips of NG2<sup>+</sup> cell processes (ON  $24 \pm 2\%$ , SC wm  $26 \pm 2\%$ , CB wm  $23 \pm 2\%$ , CC  $14$   
16  $\pm 2\%$ )(**Figure 8A,B**). In addition, NOR associations with NG2<sup>+</sup> cell process tips can also be  
17 observed in the random NOR distribution (% of NOR w/in 0.5  $\mu\text{m}$  found at process tips; ON  $18$   
18  $\pm 2\%$ , SC wm  $12 \pm 2\%$ , CB wm  $13 \pm 1\%$ , CC  $12 \pm 2\%$ )(**Figure 8A**), indicating that some of  
19 these apparent tip-NOR interactions may be due to chance alone. Finally, only a small subset of  
20 NG2<sup>+</sup> cell process tips terminated at NOR (% of tips w/in 0.5  $\mu\text{m}$  of NOR; ON  $8 \pm 1\%$   $N = 10$ ,  
21 SC wm  $8 \pm 1\%$   $N = 7$ , CB wm  $9 \pm 1\%$   $N = 7$ , CC  $3 \pm 1\%$ ) (**Figure 8C**). Together these data  
22 suggest that attraction to NOR is not the primary factor guiding the extension of NG2<sup>+</sup> cell  
23 process tips.

24

### 25 *Association with NOR does not play a crucial role in shaping the morphology of NG2<sup>+</sup> cells*

26 To further explore whether interactions with NOR play a key role in regulating NG2<sup>+</sup> cell  
27 process extension, we performed detailed morphological comparisons of gray and white matter  
28 NG2<sup>+</sup> cells. If NOR interaction played a dominant role in regulating NG2<sup>+</sup> cell process  
29 extension, then NG2<sup>+</sup> cells in regions of high NOR density (i.e. white matter tracts) should be  
30 morphologically more complex than NG2<sup>+</sup> cells in regions of low NOR density (i.e. gray matter  
31 regions). To test this hypothesis, individual NG2<sup>+</sup> cells in two gray matter regions, CA1

1 hippocampus (HC) and cerebellar molecular layer (CB ml), were morphologically reconstructed  
2 as described above (**Figure 9A**) and compared to individually reconstructed white matter NG2<sup>+</sup>  
3 cells. Gray matter regions displayed dramatically lower NOR density compared to white matter  
4 regions ( $P < 0.0004$  all gray matter vs. white matter region comparisons, t-test) (**Figure 9C**).  
5 While CA1 HC contained a small number of identifiable NOR, CB ml showed only diffuse  
6 labeling with NaV antibody and a complete absence of NOR (**Figure 9B**). This observation is  
7 consistent with existing literature indicating that parallel fibers in the rodent CNS are  
8 unmyelinated (Wyatt et al., 2005) and NOR and axon initial segments were clearly visible in the  
9 adjacent Purkinje and granule cell layers, indicating that immunolabeling for NOR is effective in  
10 cerebellar tissues. Despite a dramatically lower NOR density, gray matter NG2<sup>+</sup> cells displayed  
11 highly complex morphologies (**Figure 9D,E**). Total process length of gray matter NG2<sup>+</sup> cells  
12 was comparable to or exceeded that of white matter NG2<sup>+</sup> cells (ON vs HC  $P = 0.002$ ; CB wm vs  
13 HC  $P = 0.005$ ; all other white matter vs. gray matter comparisons n.s., t-test). Similarly, number  
14 of branch points of gray matter NG2<sup>+</sup> cells was comparable to or exceeded that of white matter  
15 NG2<sup>+</sup> cells (ON vs HC  $P = 0.0003$ ; SC wm vs HC  $P = 0.003$ ; CB wm vs HC  $P = 0.0002$ ; CB wm  
16 vs CB gm  $P = 0.002$ ; CC vs HC  $P = 0.003$ ; all other white matter vs. gray matter comparisons  
17 n.s., t-test). Together, these observations support the conclusion that interaction with NOR does  
18 not play a dominant role in determining NG2<sup>+</sup> cell arborization.

19

20

## 21 **DISCUSSION**

22 Nervous system function depends on the successful propagation of nerve impulses over long  
23 distances. The critical role that myelination and NOR play in such long range signaling has been  
24 appreciated since electrophysiology studies in the late 1940's (Huxley and Stampfli, 1949). The  
25 NOR is a highly specialized structure with elaborate adhesive and signaling interactions between  
26 the axon and surrounding glial cells. In the PNS, Schwann cell filopodia play critical roles in  
27 node formation and maintenance. In the CNS, interactions between myelinating  
28 oligodendrocytes and the underlying axon support the proper segregation of voltage-gated  
29 sodium and potassium channels to nodal and perinodal regions, respectively (Poliak and Peles,  
30 2003). The processes of perinodal astrocytes contact the exposed nodal axolemma and are  
31 thought to play key roles in maintaining local ion homeostasis (Waxman et al., 1994). However,

1 numerous questions about the formation and maintenance of CNS NOR persist, and it is unclear  
2 which nodal elements play functional roles analogous to the Schwann cell filopodia in the PNS.  
3  
4 NG2<sup>+</sup> cells arise from bipolar progenitors which migrate outward from the sub-ventricular zone  
5 during late embryogenesis (Richardson et al., 2006). These NG2<sup>+</sup> progenitors then elaborate  
6 numerous branched processes and ultimately populate the entire CNS. During early postnatal  
7 periods, NG2<sup>+</sup> cells give rise to oligodendrocytes but remain ubiquitous throughout life (Levison  
8 et al., 1999; Rivers et al., 2008). While NG2<sup>+</sup> cells could serve as an oligodendrocyte reservoir to  
9 support ongoing myelin turnover or remyelination following a demyelinating insult, the role that  
10 these progenitors play in the adult CNS is still unclear. BrdU labeling studies suggest that a  
11 subset of adult NG2<sup>+</sup> cells is quiescent (Psachoulia et al., 2009), raising the possibility that these  
12 non-proliferative NG2<sup>+</sup> cells have unique functional roles. Contact between NG2<sup>+</sup> cells and NOR  
13 has been clearly observed or inferred using electron microscopic approaches in optic nerve of  
14 adult rats (Butt et al., 1999; Serwanski et al., 2017) and spinal cord of mice (Serwanski et al.,  
15 2017), suggesting that some NG2<sup>+</sup> cells may participate in regulating nodal function.  
16 Immunostaining for NG2 proteoglycan yielded high estimates of the percent of NOR contacted  
17 by NG2 cell processes (33-71%) (Hamilton et al., 2010; Serwanski et al., 2017) and NG2<sup>+</sup> cell  
18 processes in the spinal cord white matter have been suggested to regulate the formation of axon  
19 collaterals at NOR (Huang et al., 2005) and to influence conduction efficacy (Hunanyan et al.,  
20 2010). These findings invite a revised understanding of nodal structure and function in which  
21 NG2<sup>+</sup> glia play a key role in shaping neuronal impulses, analogous to the tripartite synapse  
22 model in which glia actively modulate signaling at central synapses (Perea et al., 2009).  
23 However, the prevalence of NG2<sup>+</sup> cell processes at NOR has not been rigorously quantified in  
24 the adult CNS, nor have the instances of apparent contact in light microscopic analysis that occur  
25 by chance alone been estimated.

26  
27 In the present study, we used transgenic and light microscopic approaches to obtain the first  
28 comprehensive quantification of the spatial relationship between NG2<sup>+</sup> cells and NOR in the  
29 adult CNS. To effectively visualize the highly ramified processes of NG2<sup>+</sup> cells, we used BAC  
30 transgenic mice that express membrane-targeted EGFP under control of the NG2 promoter  
31 (*NG2-mEGFP*). In these mice, EGFP expression is restricted to NG2<sup>+</sup> cells, is distributed

1 throughout the entire cell membrane, as assessed by immunostaining for GFP and NG2, and  
2 provides superior labeling of cell processes (Hughes et al., 2013). Because NG2<sup>+</sup> cells are tiled  
3 throughout the CNS, a particular advantage of the *NG2-mEGFP-L* low expression line was the  
4 ability to clearly distinguish the processes of an individual NG2<sup>+</sup> cell from those of neighboring  
5 NG2<sup>+</sup> cells, which is challenging with immunostaining. While light microscopy cannot approach  
6 the nanometer resolution offered by electron microscopic approaches, acquisition of stacks of  
7 confocal images from *NG2-mEGFP-L* mice allowed us to perform quantitative analysis of entire  
8 cells and determine where along NG2<sup>+</sup> cell process putative interactions with NOR occur. Our  
9 data are consistent with the idea that interaction between NG2<sup>+</sup> cells and NOR does take place.  
10 However, using several approaches, we find that in 4 distinct CNS white matter tracts a minority  
11 of NOR (7-14%) are in close proximity to NG2<sup>+</sup> cell processes. Ultrastructural analysis indicates  
12 that astrocytes and NG2<sup>+</sup> cells that contact NOR come within nanometers of the exposed  
13 axolemma, suggesting that our analysis likely represents an overestimation of the instances of  
14 actual contact between these structures. These data indicate that NG2<sup>+</sup> cells are not a permanent  
15 fixture at the majority of NOR, making it unlikely that they regulate neurite outgrowth or  
16 influence conduction efficacy at these structures. The observation of pockets of white matter  
17 devoid of NG2<sup>+</sup> cell processes where NOR density is unaltered also argues that the continuous  
18 presence of NG2<sup>+</sup> cell processes is not necessary for proper node functioning.

19  
20 Despite the fact that NG2<sup>+</sup> cell processes are not present at most NOR, the number of observed  
21 interactions between NG2<sup>+</sup> cells and NOR was greater than would be expected due to chance  
22 alone, suggesting that NG2<sup>+</sup> cells do associate with a small number of NOR in their vicinity.  
23 Though regional differences in NG2<sup>+</sup> cell morphology have been noted qualitatively (Dawson et  
24 al., 2003), the factors governing elaboration of NG2<sup>+</sup> cell processes have not been demonstrated.  
25 In addition, quantitative analysis of NG2<sup>+</sup> cell morphology has been very limited. Does attraction  
26 to NOR influence the elaboration of NG2<sup>+</sup> cell processes? Though the density of NOR is  
27 dramatically higher in white as compared to gray matter regions (**Figure 9C**), NG2<sup>+</sup> cells in  
28 white matter are not morphologically more complex than gray matter NG2<sup>+</sup> cells, indicating that  
29 interaction with NOR is not a major factor shaping NG2<sup>+</sup> cell morphology. In addition, when  
30 examining the end points of NG2<sup>+</sup> cell processes, only 3-9% (**Figure 8C**) of process tips were  
31 found in close proximity to NOR which does not support the hypothesis that these processes

1 extend specifically to contact NOR. NG2<sup>+</sup> cells in corpus callosum were found previously to  
2 exhibit a higher degree of synaptic connectivity than NG2<sup>+</sup> cells in hippocampus, cerebellar  
3 molecular layer, or cerebellar white matter (De Biase et al., 2010), yet callosal NG2<sup>+</sup> cells are not  
4 significantly larger or more complex than NG2<sup>+</sup> cells in other brain regions, suggesting that  
5 formation of synapses is also not a major determinant of NG2<sup>+</sup> cell morphology. Further study  
6 will be needed to elucidate what governs the extension and branching of NG2<sup>+</sup> cell processes.

7  
8 Our observation of sparse interaction between NG2<sup>+</sup> cells and NOR is in disagreement with  
9 recent estimates that NG2<sup>+</sup> cells contact  $71 \pm 8\%$  of NOR in the rat anterior medullary velum  
10 (Hamilton et al., 2010) and 33-49% of NOR in mouse corpus callosum, mouse spinal cord, and  
11 rat optic nerve (Serwanski et al., 2017). These differences may stem from distinct  
12 methodological approaches such as definitions of what constitutes “interaction” between NG2<sup>+</sup>  
13 cells and NOR and from the inclusion of estimates of chance NOR-NG2<sup>+</sup> cell interactions in our  
14 study. However, a more intriguing possibility is that these differences arise from analysis of  
15 different developmental stages. While we analyzed adult tissue (P55 – 85) in which myelination  
16 should be complete, Hamilton et al. and Serwanski et al. examined earlier developmental time  
17 points (P15 and P30, respectively). In addition, ankyrinG, which Hamilton et al. and Serwanski  
18 et al. used to identify NOR for quantification, has been shown to cluster at developing NOR prior  
19 to clustering of NaV and KV, and formation of a fully mature node (Dzhashiashvili et al., 2007).  
20 If NG2<sup>+</sup> cells play a role in the early formation of immature NOR, this could explain the  
21 observation of a higher percentage of interactions at earlier developmental time points. Further,  
22 the small number of lingering interactions observed in the adult CNS could be due to ongoing  
23 myelin replacement and internode shortening that occurs throughout life. To explore this  
24 possibility we performed a limited analysis of optic nerve tissue from P25 mice and found that  
25 the percentage of NOR that come in close proximity to NG2<sup>+</sup> cell processes did not differ  
26 significantly from adult mice ( $P = 0.17$  Adult vs. P25 ON, corrected % NOR within  $0.5 \mu\text{m}$ ;  $P =$   
27  $0.09$  Adult vs. P25 ON, corrected % NOR within  $1 \mu\text{m}$ ; t-test)(**Figure 10**), suggesting that even  
28 before myelination of optic nerve is complete, only sparse interaction between NG2<sup>+</sup> cells and  
29 NOR is observed.

30



1 What alternative hypotheses could explain the observation of sparse interaction between NG2<sup>+</sup>  
2 cells and NOR? As oligodendrocyte progenitors, it could be that NG2<sup>+</sup> cells need to sample  
3 activity from a certain, random subset of axons in their vicinity, in order to know whether  
4 additional myelination is necessary. Alternatively, perhaps neighboring NG2<sup>+</sup> cells compete for a  
5 myelination- inducing signal and, as one neighbor wins out and begins to myelinate, the contact  
6 between the losing NG2<sup>+</sup> progenitor and the NOR represents the remnant of this competition. It  
7 should also be pointed out that even in a homogeneous white matter tract such as the optic nerve,  
8 axons arise from distinct types of retinal ganglion cells that display different rates of activity.  
9 Perhaps NG2<sup>+</sup> cells preferentially interact with the NOR of axons displaying certain activity  
10 patterns; findings from Serwanski et al. suggest that NG2 immunostaining is more frequently  
11 observed at NOR on large diameter axons and at NOR with larger nodal gap width. Finally, a  
12 caveat of our study, and all existing examinations of NG2<sup>+</sup> cell-NOR interactions, is that these  
13 data represent observations at discrete moments in time. Using *in vivo* 2 photon imaging  
14 approaches, NG2<sup>+</sup> cells in the cortex have been shown to actively remodel their processes over  
15 the course of minutes (Hughes et al., 2013). The present study cannot rule out the possibility that  
16 NG2<sup>+</sup> cells dynamically contact NOR, to sample activity or deposit some signaling factor.  
17 However, the existence of NG2<sup>+</sup> cell process “voids” which can span up to 25µm suggests that  
18 large scale process remodeling would be necessary to contact some nodes. Fiber optic or GRIN  
19 lens technology, which will allow *in vivo* two photon imaging in deeper white matter structures,  
20 in combination with genetic tools such as the *NG2-mEGFP* mice will be necessary to address  
21 this possibility. In addition, genetic strategies aimed at ablation of NG2<sup>+</sup> cells will provide the  
22 opportunity to clarify whether these cells play a role in regulating collateralization at NOR or in  
23 influencing axon conduction.

24

25

## 26 REFERENCES

- 27 Butt AM, Duncan A, Hornby MF, Kirvell SL, Hunter A, Levine JM, Berry M (1999) Cells expressing the  
28 NG2 antigen contact nodes of Ranvier in adult CNS white matter. *Glia* 26:84-91.
- 29 Dawson MR, Polito A, Levine JM, Reynolds R (2003) NG2-expressing glial progenitor cells: an  
30 abundant and widespread population of cycling cells in the adult rat CNS. *Mol Cell Neurosci*  
31 24:476-488.
- 32 De Biase LM, Nishiyama A, Bergles DE (2010) Excitability and synaptic communication within the  
33 oligodendrocyte lineage. *J Neurosci* 30:3600-3611.



- 1 Dupree JL, Coetzee T, Blight A, Suzuki K, Popko B (1998) Myelin galactolipids are essential for proper  
2 node of Ranvier formation in the CNS. *J Neurosci* 18:1642-1649.
- 3 Dzhashiashvili Y, Zhang Y, Galinska J, Lam I, Grumet M, Salzer JL (2007) Nodes of Ranvier and axon  
4 initial segments are ankyrin G-dependent domains that assemble by distinct mechanisms. *J Cell*  
5 *Biol* 177:857-870.
- 6 Eshed Y, Feinberg K, Poliak S, Sabanay H, Sarig-Nadir O, Spiegel I, Bermingham JR, Jr., Peles E (2005)  
7 Gliomedin mediates Schwann cell-axon interaction and the molecular assembly of the nodes of  
8 Ranvier. *Neuron* 47:215-229.
- 9 Hamilton N, Vayro S, Wigley R, Butt AM (2010) Axons and astrocytes release ATP and glutamate to  
10 evoke calcium signals in NG2-glia. *Glia* 58:66-79.
- 11 Honke K, Hirahara Y, Dupree J, Suzuki K, Popko B, Fukushima K, Fukushima J, Nagasawa T, Yoshida  
12 N, Wada Y, Taniguchi N (2002) Paranodal junction formation and spermatogenesis require  
13 sulfoglycolipids. *Proc Natl Acad Sci* 99:4227-4232.
- 14 Huang JK, Phillips GR, Roth AD, Pedraza L, Shan W, Belkaid W, Mi S, Fex-Svenningsen A, Florens L,  
15 Yates JR, 3rd, Colman DR (2005) Glial membranes at the node of Ranvier prevent neurite  
16 outgrowth. *Science* 310:1813-1817.
- 17 Hughes EG, Kang SH, Fukaya M, Bergles DE (2013) Oligodendrocyte progenitors balance growth with  
18 self-repulsion to achieve homeostasis in the adult brain. *Nat Neurosci*.
- 19 Hunanyan AS, Garcia-Alias G, Alessi V, Levine JM, Fawcett JW, Mendell LM, Arvanian VL (2010)  
20 Role of chondroitin sulfate proteoglycans in axonal conduction in Mammalian spinal cord. *J*  
21 *Neurosci* 30:7761-7769.
- 22 Huxley AF, Stampfli R (1949) Evidence for saltatory conduction in peripheral myelinated nerve fibres. *J*  
23 *Physiol* 108:315-339.
- 24 Ishibashi T, Dupree JL, Ikenaka K, Hirahara Y, Honke K, Peles E, Popko B, Suzuki K, Nishino H, Baba  
25 H (2002) A myelin galactolipid, sulfatide, is essential for maintenance of ion channels on  
26 myelinated axon but not essential for initial cluster formation. *J Neurosci* 22:6507-6514.
- 27 Kang SH, Fukaya M, Yang JK, Rothstein JD, Bergles DE (2010) NG2+ CNS glial progenitors remain  
28 committed to the oligodendrocyte lineage in postnatal life and following neurodegeneration.  
29 *Neuron* 68:668-681.
- 30 Kukley M, Capetillo-Zarate E, Dietrich D (2007) Vesicular glutamate release from axons in white matter.  
31 *Nat Neurosci* 10:311-320.
- 32 Levison SW, Young GM, Goldman JE (1999) Cycling cells in the adult rat neocortex preferentially  
33 generate oligodendroglia. *J Neurosci Res* 57:435-446.
- 34 Perea G, Navarrete M, Araque A (2009) Tripartite synapses: astrocytes process and control synaptic  
35 information. *Trends Neurosci* 32:421-431.
- 36 Poliak S, Peles E (2003) The local differentiation of myelinated axons at nodes of Ranvier. *Nat Rev*  
37 *Neurosci* 4:968-980.
- 38 Psachoulia K, Jamen F, Young KM, Richardson WD (2009) Cell cycle dynamics of NG2 cells in the  
39 postnatal and ageing brain. *Neuron Glia Biol* 5:57-67.
- 40 Richardson WD, Kessaris N, Pringle N (2006) Oligodendrocyte wars. *Nat Rev Neurosci* 7:11-18.
- 41 Rivers LE, Young KM, Rizzi M, Jamen F, Psachoulia K, Wade A, Kessaris N, Richardson WD (2008)  
42 PDGFRA/NG2 glia generate myelinating oligodendrocytes and piriform projection neurons in  
43 adult mice. *Nat Neurosci* 12:1392-1401.
- 44 Serwanski DR, Jukkola P, Nishiyama A (2017) Heterogeneity of astrocyte and NG2 cell insertion at the  
45 node of ranvier. *The Journal of comparative neurology* 525:535-552.
- 46 Stanford LR (1987) Conduction velocity variations minimize conduction time differences among retinal  
47 ganglion cell axons. *Science* 238:358-360.
- 48 Sugihara I, Lang EJ, Llinas R (1993) Uniform olivocerebellar conduction time underlies Purkinje cell  
49 complex spike synchronicity in the rat cerebellum. *J Physiol* 470:243-271.
- 50 Waxman SG, Black JA, Sontheimer H, Kocsis JD (1994) Glial cells and axo-glial interactions:  
51 implications for demyelinating disorders. *Clin Neurosci* 2:202-210.

- 1 Wigley R, Butt AM (2009) Integration of NG2-glia ( synantocytes) into the neuroglial network. *Neuron*  
2 *Glia Biol*:1-8.
- 3 Wyatt KD, Tanapat P, Wang SS (2005) Speed limits in the cerebellum: constraints from myelinated and  
4 unmyelinated parallel fibers. *Eur J Neurosci* 21:2285-2290.
- 5 Zhu X, Bergles DE, Nishiyama A (2008) NG2 cells generate both oligodendrocytes and gray matter  
6 astrocytes. *Development* 135:145-157.
- 7 Ziskin JL, Nishiyama A, Rubio M, Fukaya M, Bergles DE (2007) Vesicular release of glutamate from  
8 unmyelinated axons in white matter. *Nat Neurosci* 10:321-330.

9

10

11

## 12 **FIGURE LEGENDS**

13

14 **Figure 1. NG2<sup>+</sup> cells are effectively visualized using *NG2-mEGFP* BAC transgenic mice. *A*,**  
15 **Immunostaining in representative tissue sections from *NG2-mEGFP* mice demonstrating that**  
16 **EGFP<sup>+</sup> cells are labeled by antibodies for NG2 in optic nerve, spinal cord white matter,**  
17 **cerebellum, and forebrain. White matter regions in cerebellum and forebrain are outlined with**  
18 **dashed lines. White arrows highlight examples of EGFP<sup>+</sup> pericytes, which are easily**  
19 **distinguished morphologically and were excluded from analysis. *GL* = granule cell layer, *WM* =**  
20 **white matter, *Ctx* = cortex, *CC* = corpus callosum, *HC* = hippocampus. *B*, Representative**  
21 **examples of EGFP expression in optic nerve (ON) tissue from low expression (*NG2-mEGFP-L*)**  
22 **and high expression (*NG2-mEGFP-H*) lines of mice. Yellow arrow highlights an EGFP<sup>+</sup> pericyte**  
23 **and yellow arrowheads highlight two EGFP<sup>+</sup> NG2<sup>+</sup> cells. *C*, Representative examples of EGFP**  
24 **expression in forebrain tissue from *NG2-mEGFP-L* and *NG2-mEGFP-H* mice.**

25

26 **Figure 2. Three dimensional reconstruction of optic nerve NG2<sup>+</sup> cells and surrounding**  
27 **nodes of Ranvier. *A*, Maximum intensity projection of an isolated, EGFP-expressing NG2<sup>+</sup> cell**  
28 **in optic nerve tissue from an *NG2-mEGFP-L* mouse (P56). *Dashed box* shown at higher**  
29 **magnification in *B*. *C and D*, 3D reconstruction of cell morphology. *E*, Nodes of Ranvier (NOR)**  
30 **in the same field of view as *A* revealed by immunostaining for voltage-gated sodium channels**  
31 **(NaV) in red and paranodal protein caspr in cyan; enlarged view shown in *F*. *G and H*, 3D**  
32 **tagging of NOR shown together with caspr immunostaining in cyan. *I*, Three examples of NOR**  
33 **with NaV (red) and caspr (cyan) immunostaining illustrating the accuracy of NOR tagging**  
34 **(yellow sphere); panels on the right are rotated 90° to show the x-z dimension.**

1

2 **Figure 3. NG2<sup>+</sup> cell territory and close associations with NOR.** *A*, The reconstructed NG2<sup>+</sup>  
3 cell shown in Fig. 2 and tagged NOR from the entire field of view (purple), or only those NOR  
4 that come within 10  $\mu\text{m}$  (blue), 5  $\mu\text{m}$  (orange), or 0.5  $\mu\text{m}$  (green) of the cell surface. *B*, Three  
5 examples of NOR that came within 0.5  $\mu\text{m}$  of the cell surface; immunostaining for Nav (red),  
6 caspr (blue), and EGFP (green) shown at *left* and 3D reconstruction of the cell surface and  
7 tagged NOR shown at *right*. *C*, Two examples of NG2<sup>+</sup> cell terminal processes that pass by but  
8 do not come within 0.5  $\mu\text{m}$  of surrounding NOR.

9

10 **Figure 4. Sparse NG2<sup>+</sup> cell-NOR interaction is consistent across diverse white matter**  
11 **tracts.** *A*, Immunostaining for representative EGFP<sup>+</sup> NG2<sup>+</sup> cells in spinal cord white matter (SC  
12 wm), cerebellar white matter (CB wm), and corpus callosum (CC) at *left*. (Two EGFP<sup>+</sup> NG2<sup>+</sup>  
13 cells are visible in the corpus callosum; reconstructed cell indicated by *white arrow*). 3D  
14 reconstruction for each NG2<sup>+</sup> cell shown at *right*. NOR within 5  $\mu\text{m}$  of the cell are shown in  
15 orange and those in close proximity to the cell surface (within 0.5  $\mu\text{m}$ ) are shown in green. *B*,  
16 Percentage of NOR found within 0.5  $\mu\text{m}$  of the cell surface from the pool of NOR that come  
17 within 5  $\mu\text{m}$  of the cell (*top*). Percentage of NOR found within 1  $\mu\text{m}$  of the cell surface from the  
18 same pool of NOR that are within a 5  $\mu\text{m}$  territory of the cell. *Red circles* show the number of  
19 spatial interactions after correcting for interactions expected due to chance (% of NOR within 0.5  
20  $\mu\text{m}$  using actual NOR distribution - % of NOR within 0.5  $\mu\text{m}$  using NOR distribution flipped  
21 about the Y-axis).

22

23 **Figure 5. Analysis of NG2<sup>+</sup> cell proximity to NOR using different definitions of cell**  
24 **territory.** *A*, Percentage of NOR that come within 0.5  $\mu\text{m}$  (*left*) or 1.0  $\mu\text{m}$  (*right*) of NG2<sup>+</sup> cell  
25 processes calculated from the pool of NOR that fall within 2.0  $\mu\text{m}$  of the cell (*black circles*) and  
26 the number of interactions after correcting for interactions expected due to chance (*red circles*).  
27 *B*, Percentage of NOR that come within 0.5  $\mu\text{m}$  (*left*) or 1.0  $\mu\text{m}$  (*right*) of NG2<sup>+</sup> cell processes  
28 calculated from the pool of NOR that fall within 10.0  $\mu\text{m}$  of the cell. ON = optic nerve, SC wm =  
29 spinal cord white matter, CB wm = cerebellar white matter, CC = corpus callosum.

30

1 **Figure 6. Region based analysis confirms sparse NG2<sup>+</sup> cell -NOR interaction.** *A*, EGFP  
2 expression (*top*) and 3D reconstruction of all EGFP<sup>+</sup> processes (*bottom*) in a volume of spinal  
3 cord white matter (SC wm). All NOR found within the region are colored *magenta*; NOR that  
4 come within 0.5 μm of NG2<sup>+</sup> cell processes are colored in *green*. *B*, Percentage of all NOR  
5 within analyzed tissue volume that come within 0.5 μm of NG2<sup>+</sup> cell processes. *Red circles* show  
6 the number of interactions after correcting for interactions expected due to chance. *C*, Percentage  
7 of all NOR within analyzed tissue volume that come within 1.0 μm of NG2<sup>+</sup> cell processes. *Red*  
8 *circles* show the number of interactions after correcting for interactions expected due to chance.  
9 ON = optic nerve, CB wm = cerebellar white matter.

10

11 **Figure 7. NOR density is unchanged in regions devoid of NG2<sup>+</sup> cell processes.** *A*,  
12 Immunostaining in spinal cord white matter from P56 high expression *NG2-mEGFP-H* mouse  
13 highlighting a region in which NG2<sup>+</sup> cell processes are largely absent (*white box*). *B*, NOR  
14 density was quantified in optic nerve (ON), spinal cord white matter (SC wm), and cerebellar  
15 white matter (CB wm) and plotted against the degree to which the field of view was covered by  
16 NG2<sup>+</sup> cell processes; no correlation was observed between the density of NOR and the degree of  
17 NG2<sup>+</sup> cell process coverage ( $R^2 = -0.1$ ,  $P = 0.78$ ).

18

19 **Figure 8. NG2<sup>+</sup> cell processes rarely terminate at NOR.** *A*, Examples of close proximity  
20 NOR (located within 0.5 μm of cell) that were found *en passant* along NG2<sup>+</sup> cell processes, or at  
21 the tips of NG2<sup>+</sup> cell processes; *yellow box* highlights NG2<sup>+</sup> cell -NOR interaction that occurred  
22 by chance (*random*). *B*, Percentage of close proximity NOR (located within 0.5 μm of cell) that  
23 were found *en passant* along NG2<sup>+</sup> cell processes (*red circles*) vs. at the tips of NG2<sup>+</sup> cell  
24 processes (*black circles*). *C*, Percentage of NG2<sup>+</sup> cell process tips that terminate near (within 0.5  
25 μm) NOR.

26

27 **Figure 9. Attraction to NOR does not significantly influence NG2<sup>+</sup> cell morphology.** *A*,  
28 Immunostaining and 3D reconstruction of individual NG2<sup>+</sup> cells in CA1 region of hippocampus  
29 (HC) and the molecular layer of cerebellum (CB ml). *B*, EGFP<sup>+</sup> NG2<sup>+</sup> cells in cerebellum with  
30 very similar morphology (*top panel*) despite the absence of NOR in the molecular layer (ML)  
31 and presence of NOR in the granule cell layer (GCL) (*bottom panel*); *arrowhead* and *inset*

1 highlight a well-defined NOR within the granule cell layer; PC = purkinje cell layer. **C**, Density  
2 of NOR in all analyzed brain regions highlighting the difference in density between white matter  
3 regions (*black circles*) and gray matter regions (*red circles*) \*  $P < 0.0004$  all gray matter vs.  
4 white matter region comparisons, t-test. **D**, Total process length for white matter (*black circles*)  
5 and gray matter (*red circles*) NG2<sup>+</sup> cells. \*  $P < 0.006$  ON vs HC, CB wm vs HC; all other white  
6 matter vs. gray matter comparisons n.s., t-test **E**, Total number of branch points for white matter  
7 (*black circles*) and gray matter (*red circles*) NG2<sup>+</sup> cells. \*  $P < 0.004$  ON vs HC, SC wm vs HC,  
8 CB wm vs HC, CB wm vs CB gm, CC vs HC; all other white matter vs. gray matter comparisons  
9 n.s., t-test.

10

11 **Figure 10. Spatial relationship between NG2<sup>+</sup> cells and NOR in optic nerve from juvenile**  
12 **mice. A**, Percentage of NOR that come within 0.5  $\mu\text{m}$  of the processes of optic nerve (ON)  
13 NG2<sup>+</sup> cells in adult and juvenile mice. *Red circles* show the number of spatial interactions after  
14 correcting for interactions expected due to chance;  $P = 0.17$  Adult vs. P25 ON, corrected % NOR  
15 within 0.5  $\mu\text{m}$ , t-test. **B**, Percentage of NOR that come within 1.0  $\mu\text{m}$  of NG2<sup>+</sup> cell processes in  
16 adult and juvenile mice. *Red circles* show the number of spatial interactions after correcting for  
17 interactions expected due to chance;  $P = 0.09$  Adult vs. P25 ON, corrected % NOR within 1  $\mu\text{m}$ ;  
18 t-test.

19



# Figure 1.

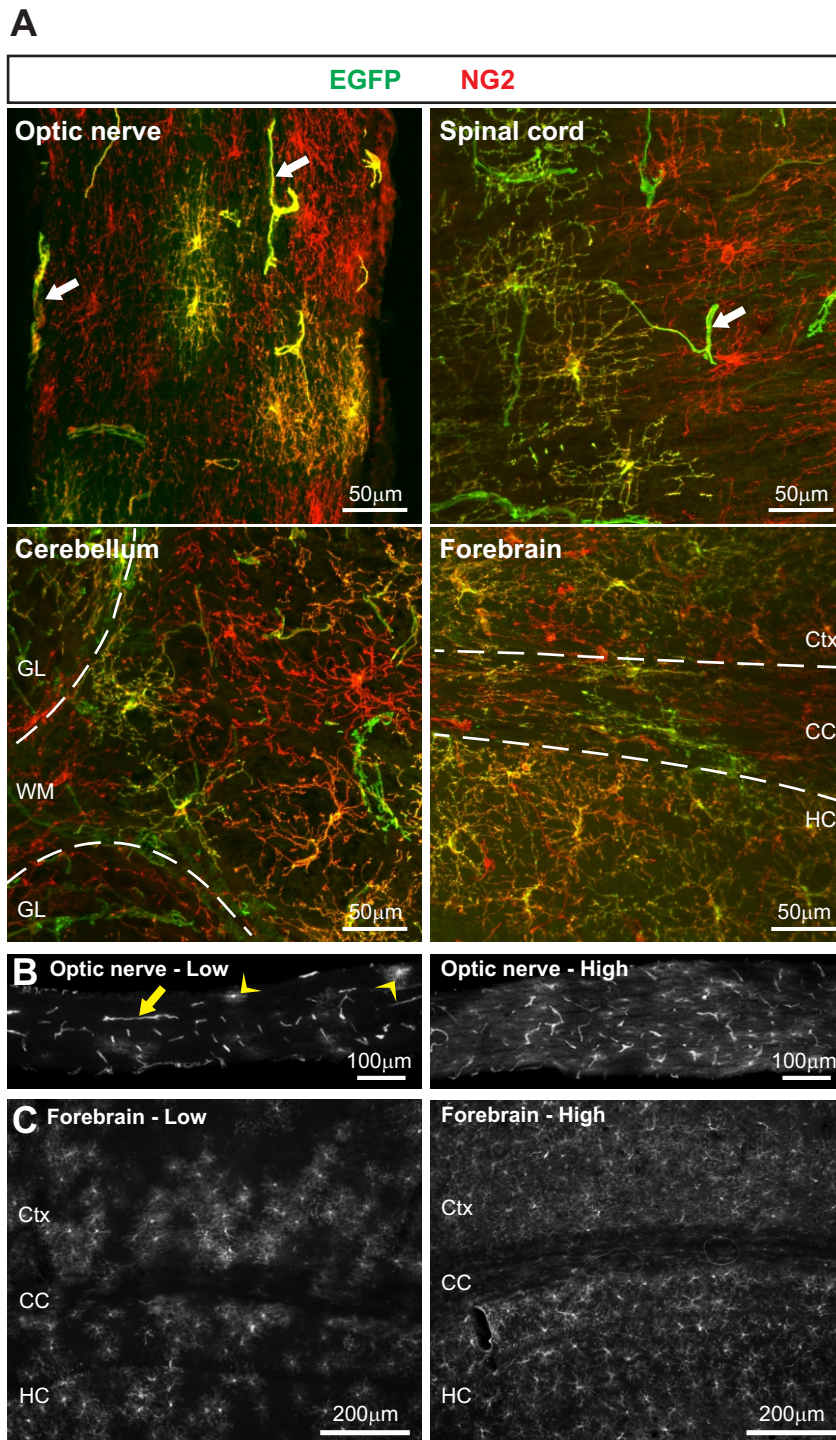

## Figure 2.

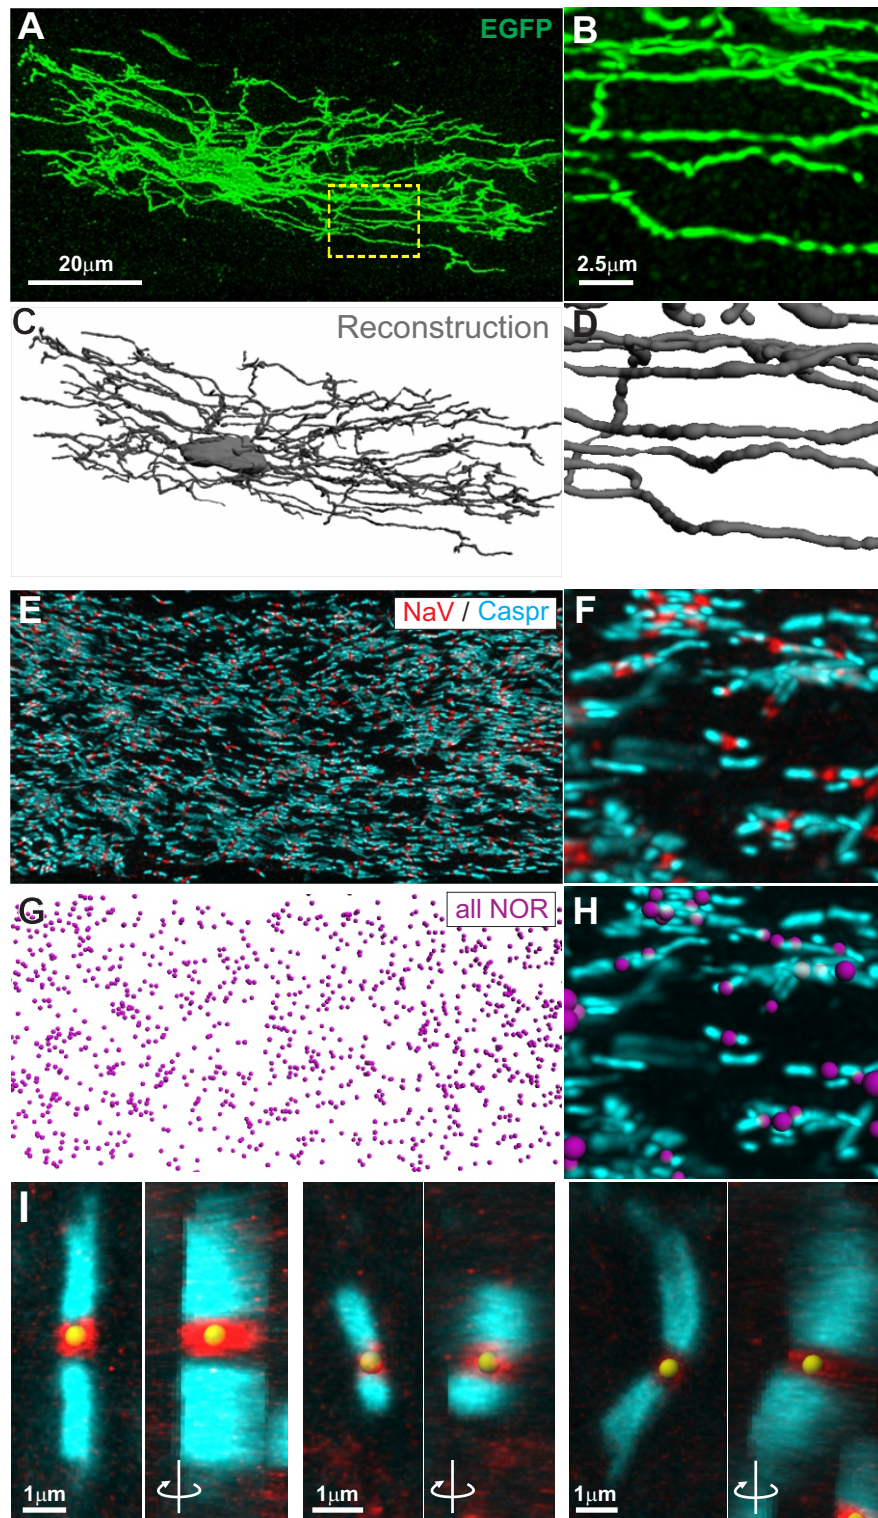



## Figure 3.

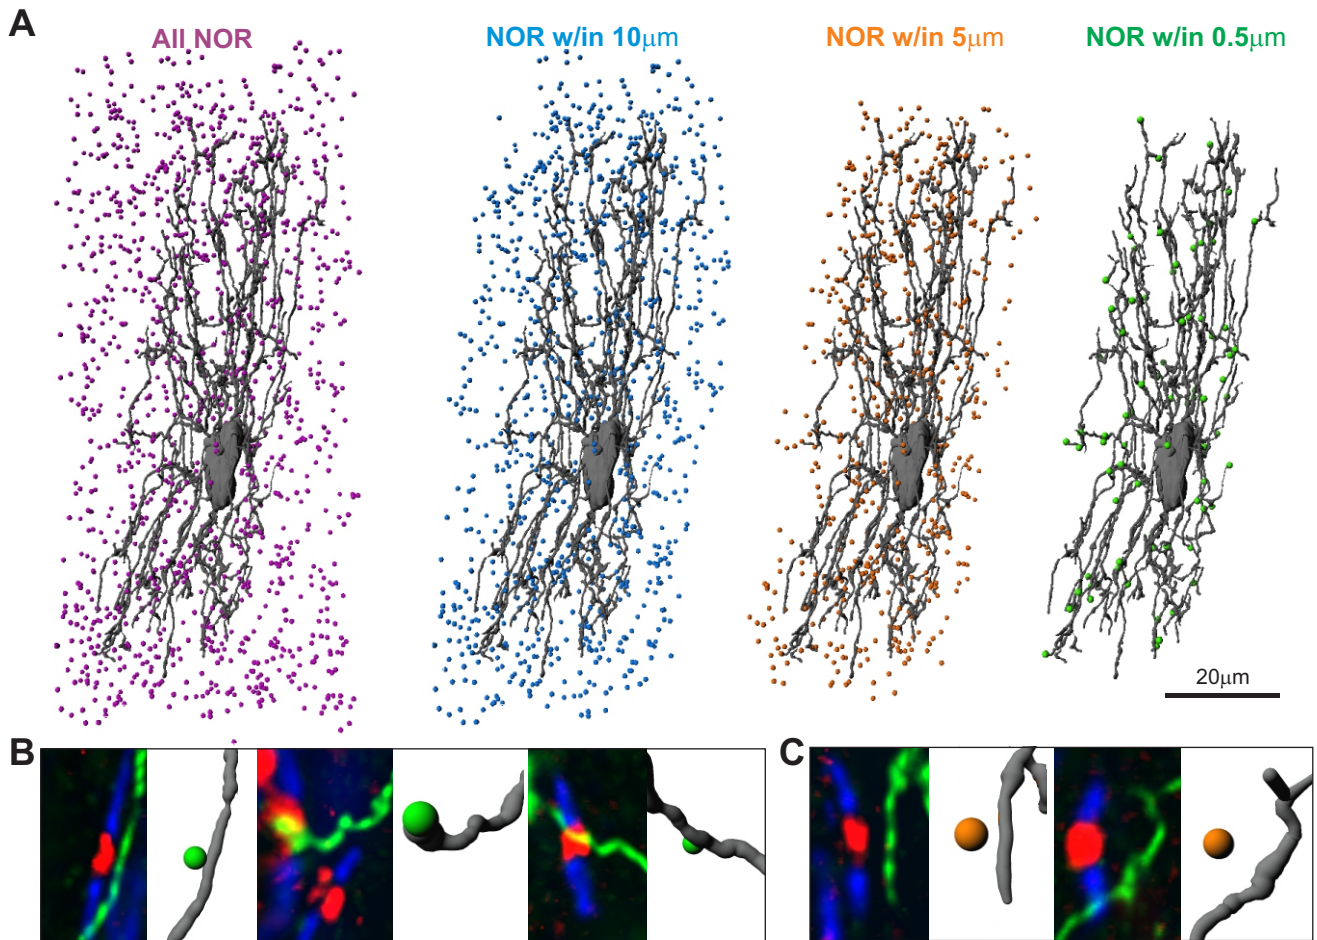

## Figure 4.

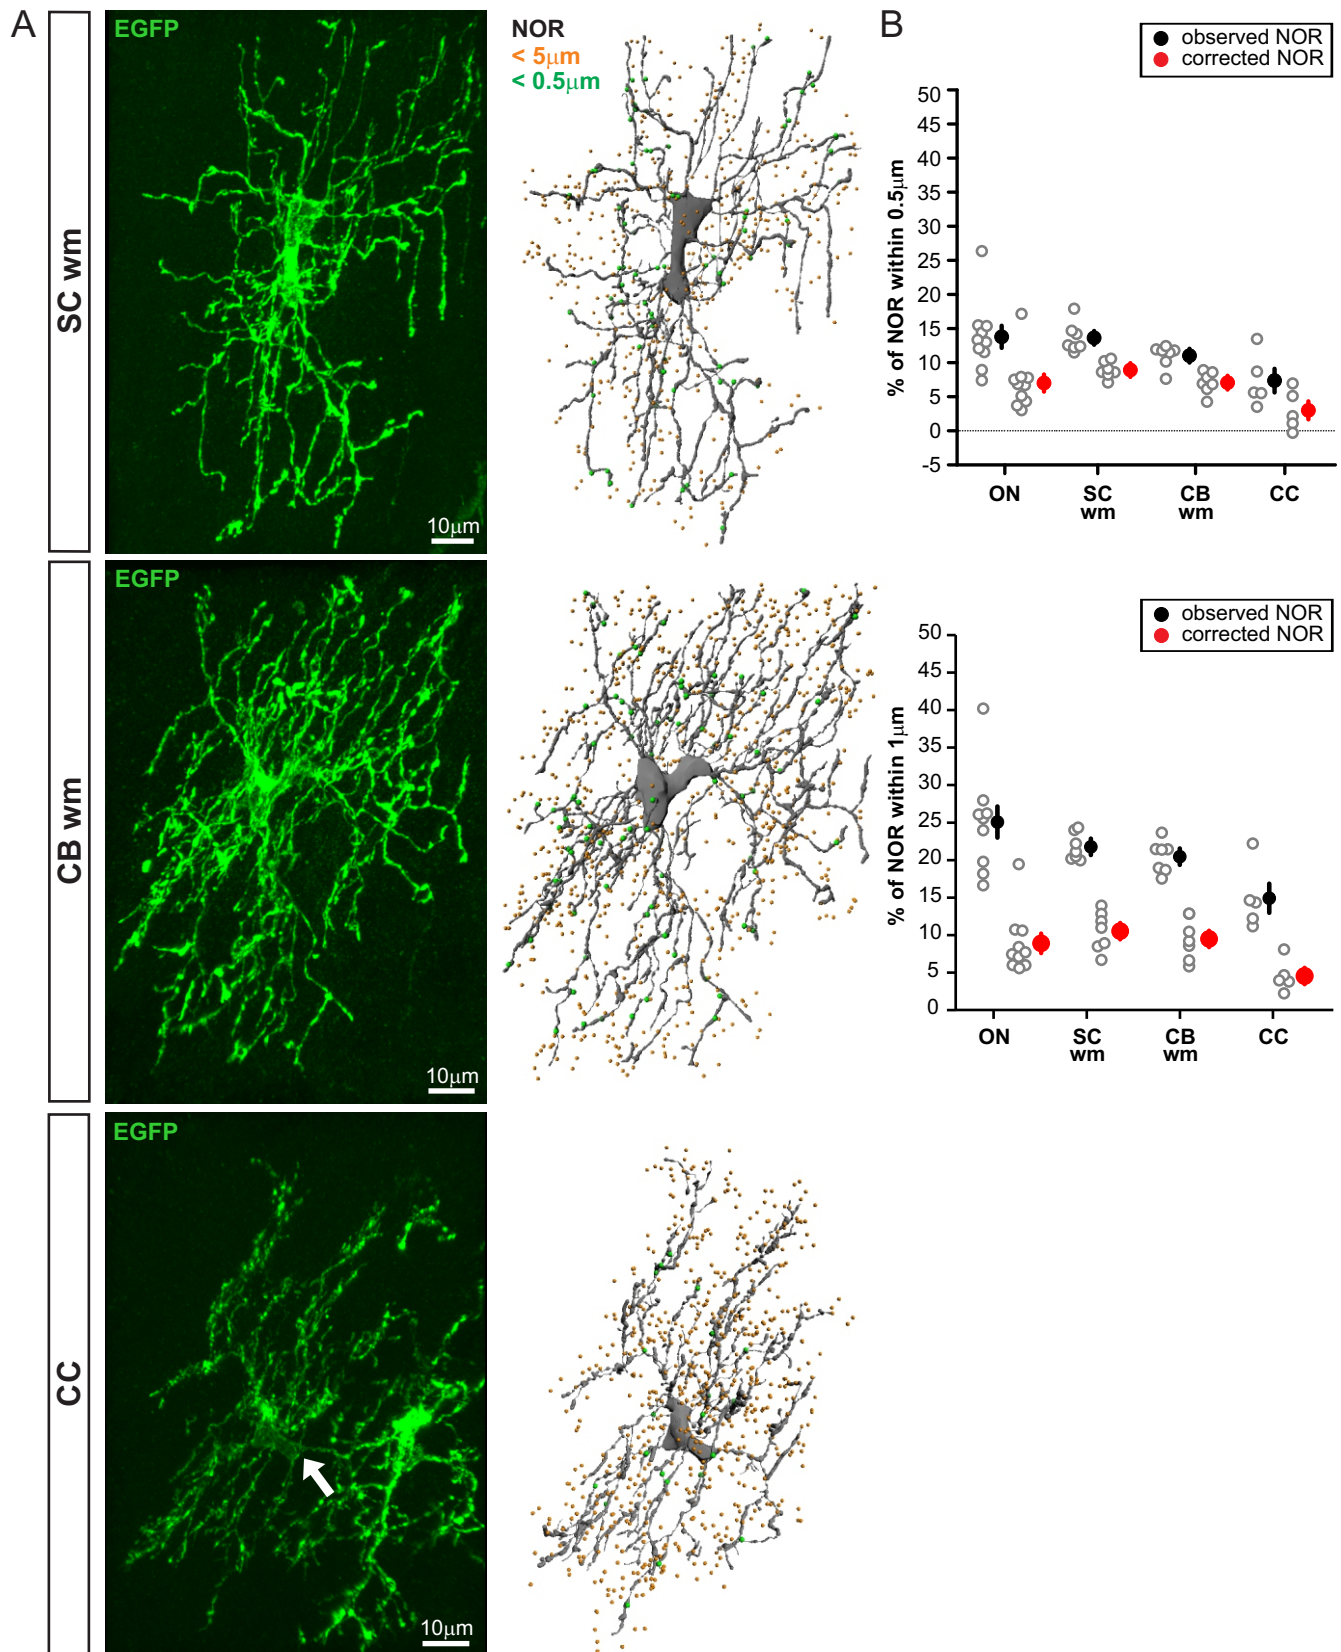

# Figure 5.

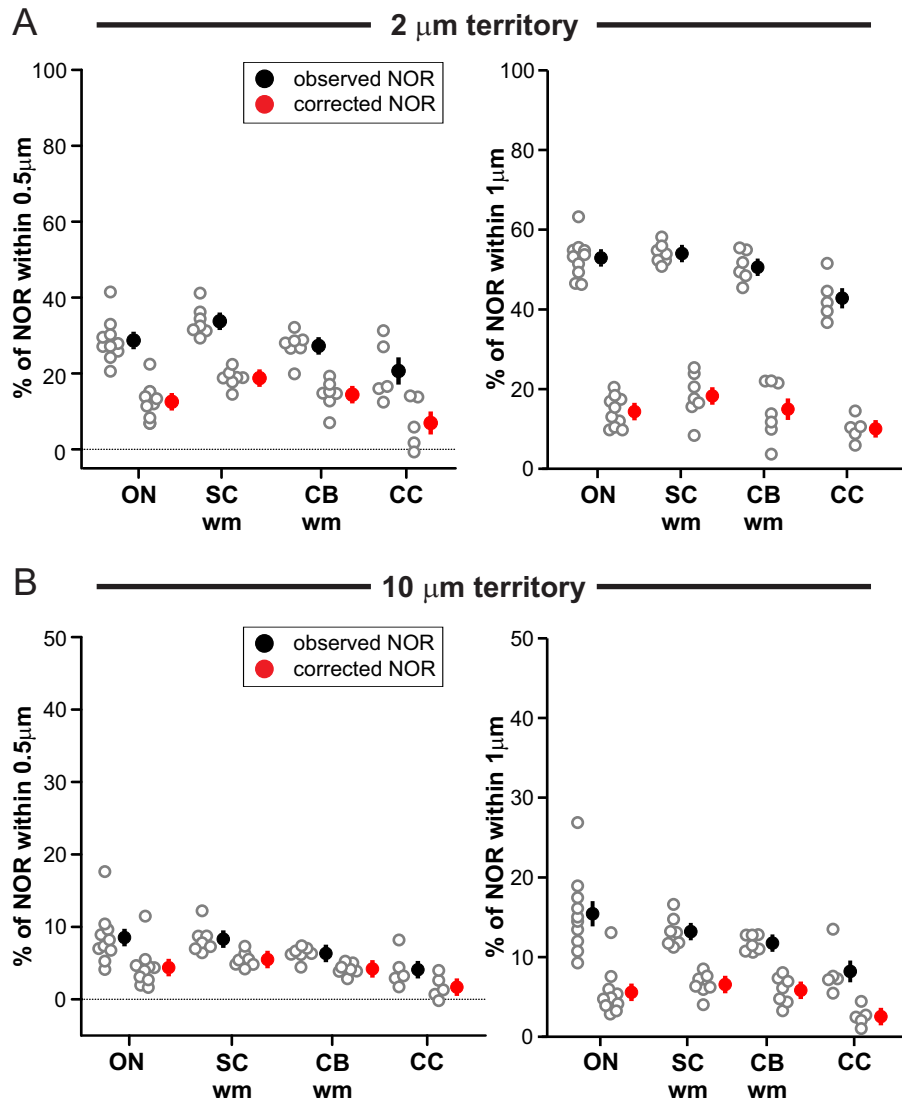

# Figure 6.

A

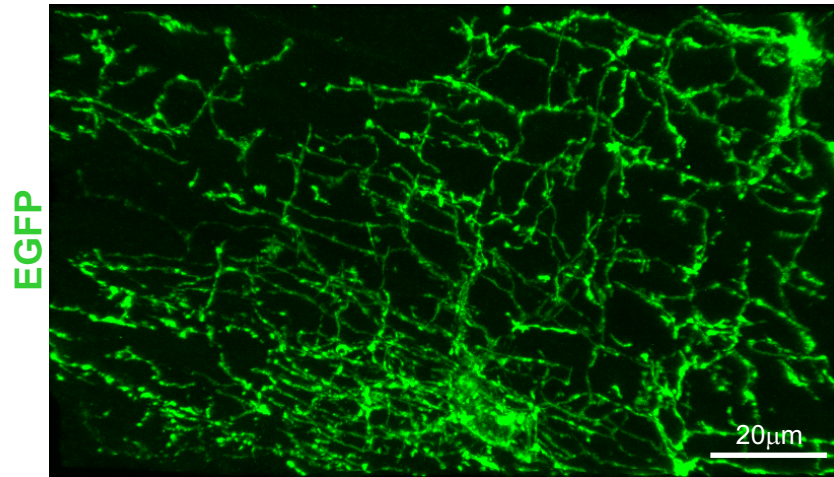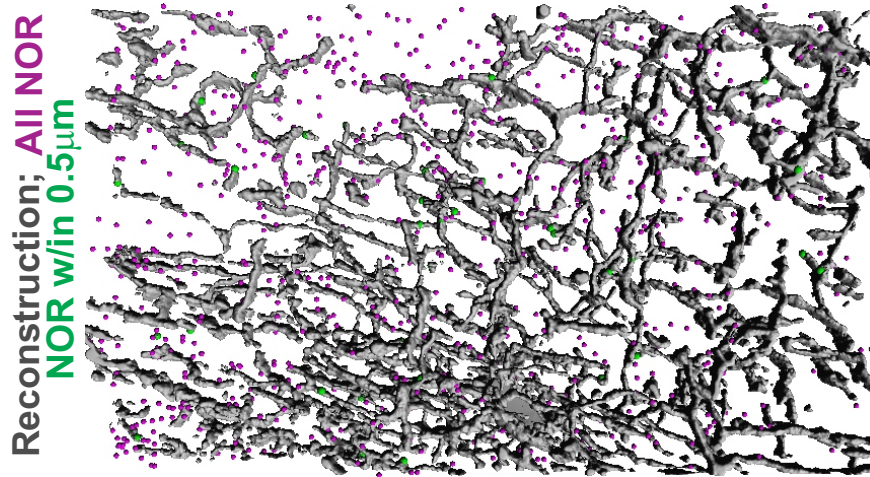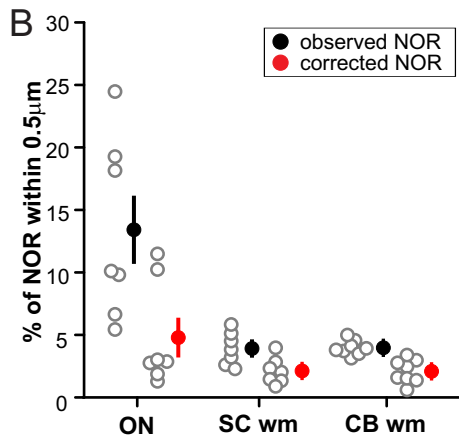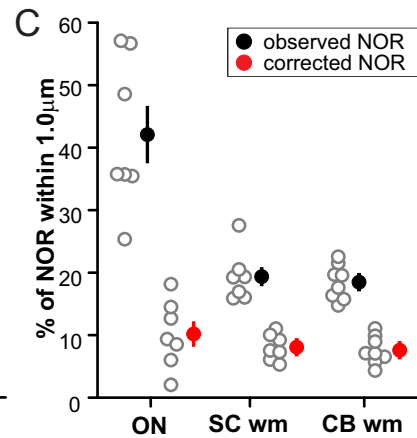



## Figure 7.

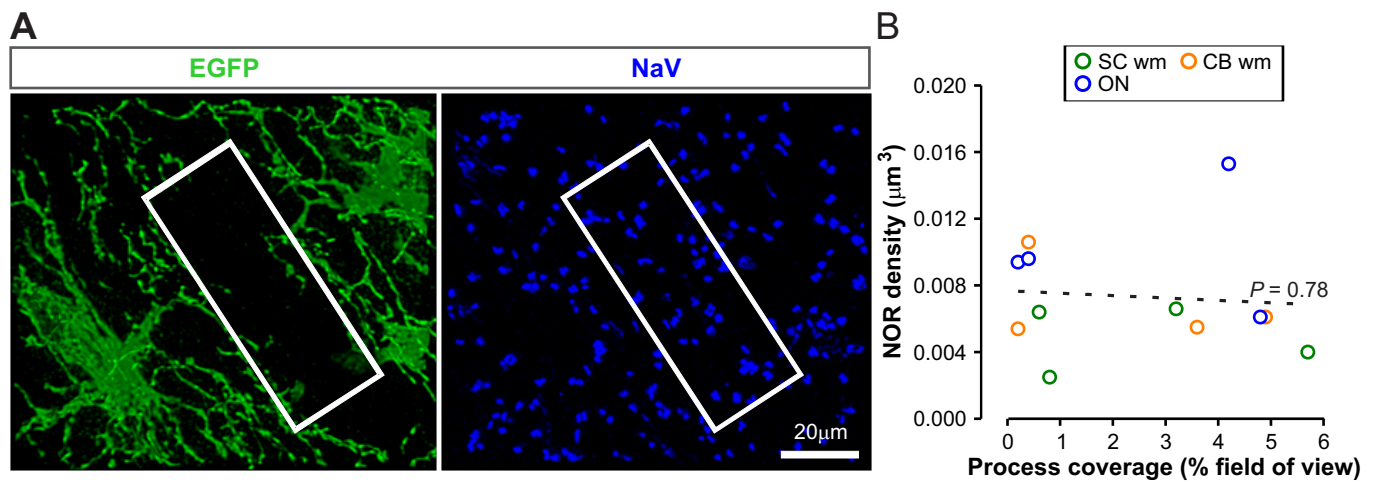

## Figure 8.

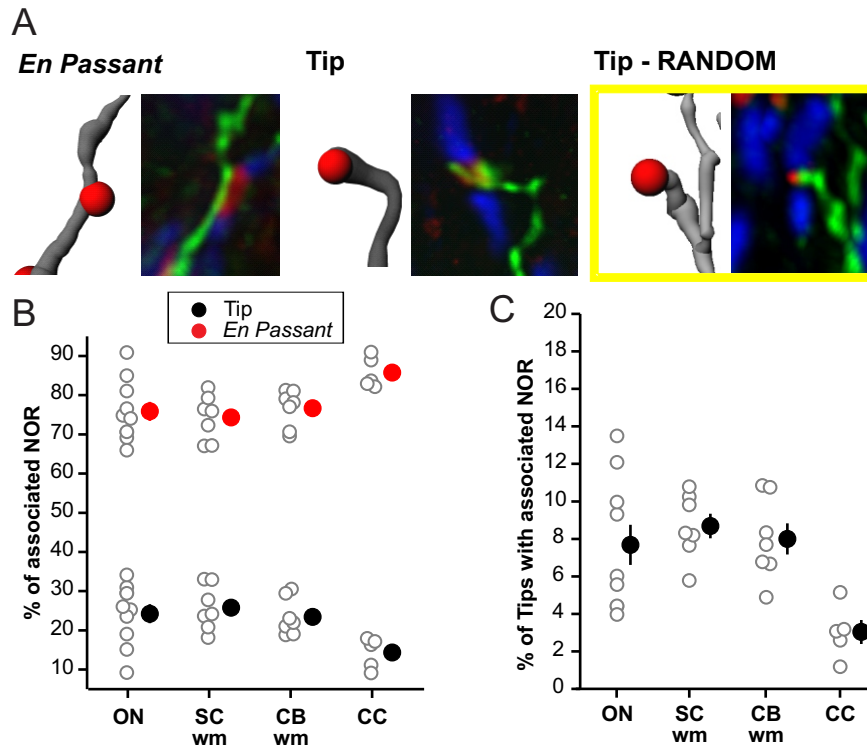

## Figure 9.

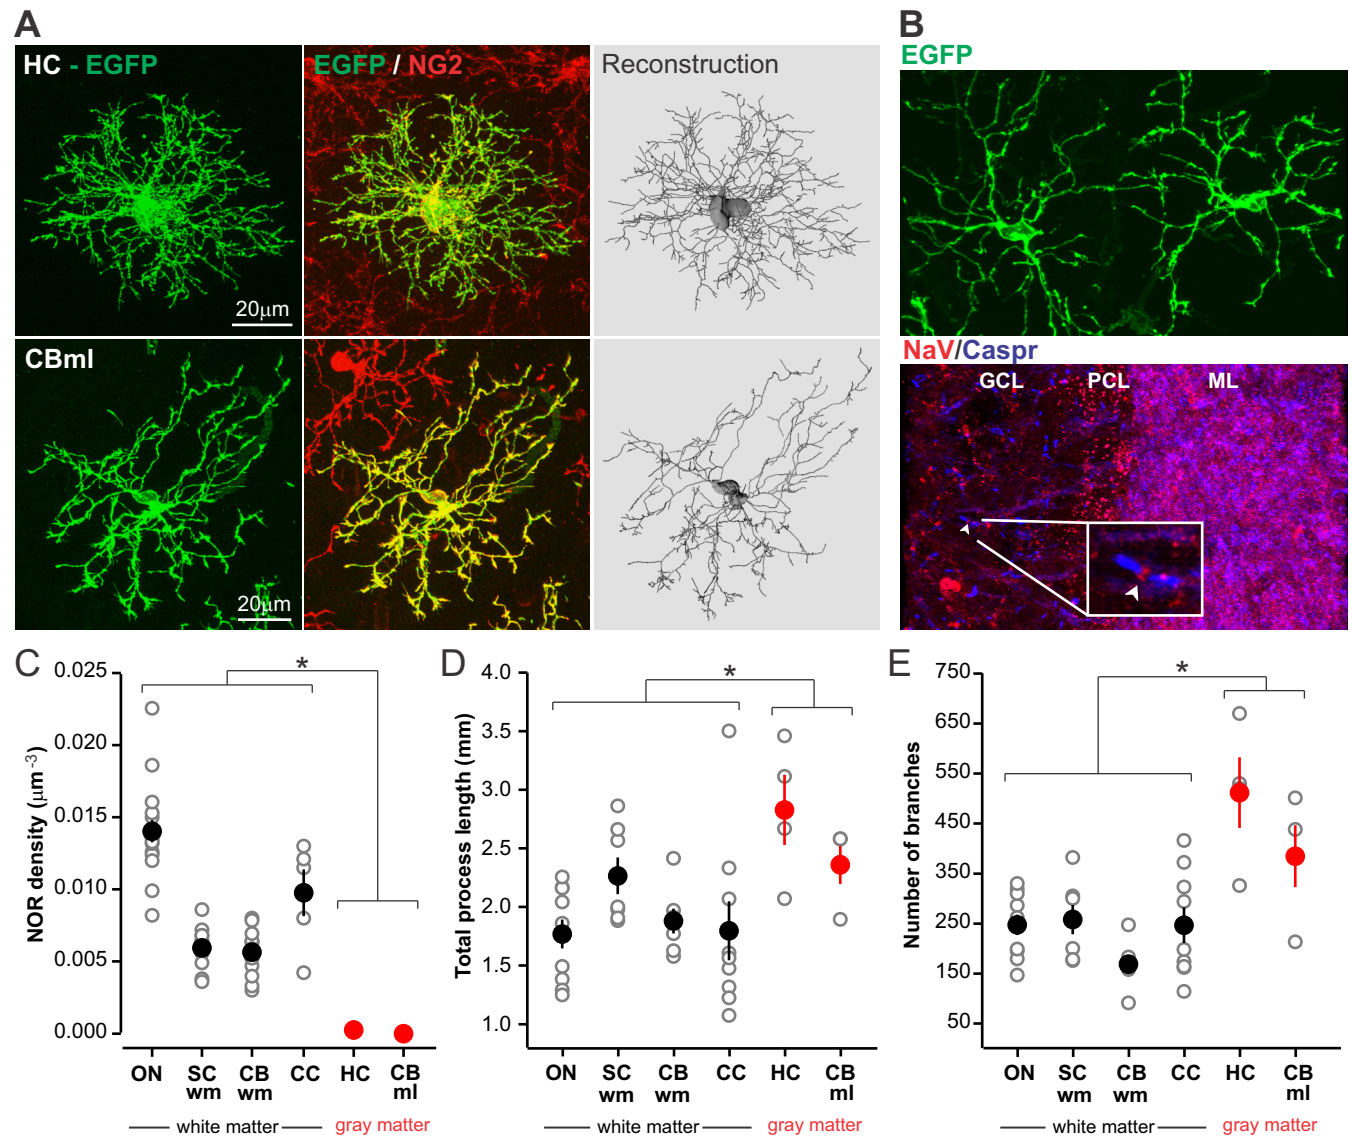



# Figure 10.

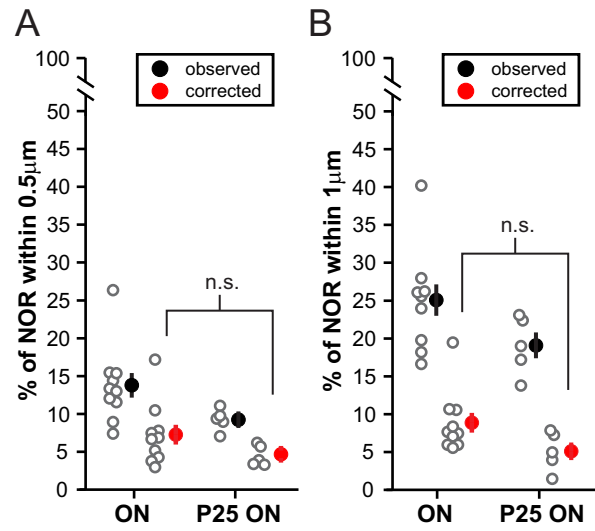

# Table 1.

| % of NOR within 0.5 $\mu$ m |           |      |         |         |      |      |     |
|-----------------------------|-----------|------|---------|---------|------|------|-----|
|                             | ON 1      | ON 2 | SC wm 1 | CB wm 1 | CC 1 | CC 2 |     |
| actual                      | 11.5      | 13.3 | 14.2    | 10.2    | 5.6  | 3.5  |     |
| random                      | rotated y | 4.8  | 5.8     | 5.1     | 4.0  | 4.5  | 3.8 |
|                             | rotated z | 5.1  | 4.7     | 3.6     | 5.4  | 4.9  | 4.8 |
|                             | shifted   | 5.1  | 6.3     | 3.0     | 6.3  | 5.3  | 3.6 |

| % of NOR within 1 $\mu$ m |           |      |         |         |      |      |      |
|---------------------------|-----------|------|---------|---------|------|------|------|
|                           | ON 1      | ON 2 | SC wm 1 | CB wm 1 | CC 1 | CC 2 |      |
| actual                    | 19.8      | 26.2 | 24.0    | 17.5    | 14.6 | 11.2 |      |
| random                    | rotated y | 11.4 | 15.5    | 10.1    | 10.9 | 10.0 | 8.9  |
|                           | rotated z | 11.8 | 13.7    | 9.6     | 12.4 | 9.4  | 12.7 |
|                           | shifted   | 13.9 | 14.3    | 10.1    | 15.6 | 12.3 | 10.8 |

**Estimation of random spatial interactions:** For six example NG2<sup>+</sup> cells, the % of NOR that came within 0.5 or 1  $\mu$ m of the cell surface in the actual NOR distribution is listed. Random spatial interactions were estimated by rotating NOR distributions 180 degrees about the Y- or Z- axis or shifting the distribution laterally by 5  $\mu$ m and re-calculating the % of NOR found within 0.5 of 1  $\mu$ m of the cell surface.
